1  
2 **Insulin-like growth factor-2 does not improve behavioral deficits in  
mouse and rat models of Angelman Syndrome**

3 Elizabeth L. Berg<sup>1†</sup>, Stela P. Petkova<sup>1†</sup>, Heather A. Born<sup>2,3</sup>, Anna Adhikari<sup>1</sup>, Anne E. Anderson<sup>2</sup>, and Jill  
4 L. Silverman<sup>1\*</sup>  
5

6 <sup>1</sup>MIND Institute and Department of Psychiatry and Behavioral Sciences, University of California Davis  
7 School of Medicine, Sacramento, CA, USA.  
8

9 <sup>2</sup>Department of Pediatrics and Neurology, Baylor College of Medicine, Houston, TX, USA.  
10

11 <sup>3</sup>Gene Therapy Program, Perelman School of Medicine, University of Pennsylvania, Philadelphia, PA,  
12 USA.  
13

14 <sup>†</sup>Contributed equally to this work  
15

16 \*Corresponding author:  
17 Jill L. Silverman

18 MIND Institute and Department of Psychiatry and Behavioral Sciences  
19 University of California Davis School of Medicine  
20 Research II Building 96, 4625 2<sup>nd</sup> Avenue, Suite 1001B  
21 Sacramento, CA 95817  
22 Phone: 916-734-8531  
23 Email: [jsilverman@ucdavis.edu](mailto:jsilverman@ucdavis.edu)  
24

25 Contact information:  
26

27 Elizabeth L. Berg, PhD: [lizberg@ucdavis.edu](mailto:lizberg@ucdavis.edu); ORCID: 0000-0001-6413-2561  
28 Stela P. Petkova, PhD: [spetkova@ucdavis.edu](mailto:spetkova@ucdavis.edu); ORCID: 0000-0003-2700-184X  
29 Heather A. Born, PhD: [hborn@upenn.edu](mailto:hborn@upenn.edu); ORCID: 0000-0001-9934-648X  
30 Anna Adhikari: [aadhikari@ucdavis.edu](mailto:aadhikari@ucdavis.edu)  
31 Anne E. Anderson, MD: [annea@bcm.edu](mailto:annea@bcm.edu); ORCID: 0000-0001-7639-2504  
32 Jill L. Silverman, PhD: [jsilverman@ucdavis.edu](mailto:jsilverman@ucdavis.edu); ORCID: 0000-0001-9357-5476  
33

34 Keywords: Angelman Syndrome, ubiquitin, Ube3a, insulin-like growth factor, IGF, mouse model, rat  
35 model, EEG, behavior  
36  
37  
38  
39

40  
41  
42  
43

44 **Abstract**

45

46 **Background:** Angelman Syndrome (AS) is a rare neurodevelopmental disorder for which there is  
47 currently no cure or effective therapeutic. Since the genetic cause of AS is known to be dysfunctional  
48 expression of the maternal allele of ubiquitin protein ligase E3A (*UBE3A*), several genetic animal models  
49 of AS have been developed. Both the *Ube3a* maternal deletion mouse and rat models of AS reliably  
50 demonstrate behavioral phenotypes of relevance to AS and therefore offer suitable *in vivo* systems in  
51 which to test potential therapeutics. One promising candidate treatment is insulin-like growth factor-2  
52 (IGF-2), which has recently been shown to ameliorate behavioral deficits in the mouse model of AS and  
53 improve cognitive abilities across model systems. **Methods:** We used both the *Ube3a* maternal deletion  
54 mouse and rat models of AS to evaluate the ability of IGF-2 to improve electrophysiological and  
55 behavioral outcomes. **Results:** Acute systemic administration of IGF-2 had an effect on  
56 electrophysiological activity in the brain and on a metric of motor ability, however the effects were not  
57 enduring or extensive. Additional metrics of motor behavior, learning, ambulation, and coordination were  
58 unaffected and IGF-2 did not improve social communication, seizure threshold, or cognition.  
59 **Limitations:** The generalizability of these results to humans is difficult to predict and it remains possible  
60 that dosing schemes (i.e., chronic or subchronic dosing), routes, and/or post-treatment intervals other than  
61 that used herein may show more efficacy. **Conclusions:** Despite a few observed effects of IGF-2, our  
62 results taken together indicate that IGF-2 treatment does not profoundly improve behavioral deficits in  
63 mice or rat models of AS. These findings shed cautionary light on the potential utility of acute systemic  
64 IGF-2 administration in the treatment of AS.

65 **Background**

66

67 Angelman Syndrome (AS) is a rare neurodevelopmental disorder caused by the loss of functional  
68 ubiquitin protein ligase E3A [1]. Specifically, AS results from deficient expression of the maternal allele,

69 which leaves the entire brain deficient of UBE3A due to neuron-specific imprinting that silences the  
70 paternal allele [2-6]. AS is characterized by developmental delay, intellectual disability, impaired  
71 communication, gross and fine motor deficits, as well as seizures [7-12]. Since these symptoms are severe  
72 and persistent, and there is currently no effective therapeutic or cure for the disorder, those with AS  
73 require lifelong supportive care. It is therefore imperative that novel strategies to treat AS are developed.

74 Several *in vivo* models have been generated to aid in the pursuit of effective treatments, including  
75 a conventional germline mouse [13] with a deletion of *Ube3a* in exon 2, a conditional mouse with  
76 tamoxifen reactivation [14], a larger deletion mouse [15], and rat model with a full *Ube3a* gene deletion  
77 [16]. Various models recapitulate phenotypes of AS and therefore provide useful systems in which to test  
78 candidate treatments. Lacking a functional level of UBE3A protein in the brain, models show hypo-  
79 locomotion, poor balance, impaired coordination, atypical gait, complex cognitive deficits, alongside  
80 communication deficits and aberrant social behavior. Since many of these behavioral deficits are not  
81 unique to AS, therapies that are effective for other disorders with shared symptomology, such as autism or  
82 other syndromic NDDs, may also be effective in treating AS [17-21].

83 Insulin-like growth factors (IGFs), a family of proteins with similar structure to insulin, have  
84 recently emerged as potential treatments for the social deficits, communication impairments, and  
85 repetitive behaviors of genetic syndromes associated with autism spectrum disorder (ASD) [18, 22-30].  
86 IGF-1 is being evaluated as a novel treatment for core symptoms of syndromic autisms in one of the first  
87 clinical trials of its kind (NCT01970345) [17-21, 28-33]. IGF-1 is an FDA approved, commercially  
88 available compound that crosses the blood-brain barrier and has beneficial effects on synaptic  
89 development by promoting neuronal cell survival, synaptic maturation, and synaptic plasticity. Since IGF-  
90 1 has shown efficacy in reversing deficits in mouse and neuronal models of three single gene causes of  
91 ASD (namely Rett syndrome [22, 23, 26], Phelan McDermid syndrome [27, 34], and Fragile X syndrome  
92 [28]), it may therefore be effective in treating autism spectrum disorders more broadly.

93 IGF-2, which is important for normal growth and development, tissue repair, and regeneration,  
94 has also shown promising effects on ASD-relevant behavioral domains in preclinical studies [35-40].

95 Injections into the hippocampus have demonstrated that IGF-2 is crucial to the consolidation and  
96 enhancement of memories and may be effective in ameliorating memory impairments [30, 41-43]. Since  
97 the chemical properties of IGF-2 allow it to exert action within the central nervous system after crossing  
98 the blood-brain barrier [44, 45], systemic delivery of IGF-2 represents a highly translational route of  
99 treatment. A study in mice by Stern et al. (2014) found that following systemic administration of IGF-2  
100 via subcutaneous injection, adult male C57BL/6J mice showed enhanced novel object recognition, social  
101 recognition, contextual fear memory, and working memory [42]. Moreover, in the BTBR mouse model of  
102 ASD, Steinmetz et al. (2018) found that IGF-2 treatment normalized behavior in the marble burying task,  
103 improved social interaction and social memory deficits, and enhanced novel object recognition along with  
104 other types of memory [30].

105         Despite substantial biological and behavioral differences between the inbred strain BTBR,  
106 previously used as an idiopathic ASD model, and the *Ube3a* maternal deletion model of AS, the  
107 *Ube3a*<sup>mat-/pat+</sup> mouse model of AS was recently reported by Cruz et al. (2020) to exhibit behavioral rescue  
108 following acute systemic IGF-2 treatment [46]. These encouraging results prompted us to i) investigate if  
109 the effects of IGF-2 would be rigorous, reproducible, and inter-laboratory reliable, ii) examine both the  
110 mouse and rat model of AS to determine whether IGF-2 could ameliorate or reduce the severity of  
111 communication deficits unique to the rat model of AS [16] and evaluate phenotypes observed across  
112 species (i.e., motor impairment), and iii) extend the standard, albeit non-translational, rescue of  
113 performance in the cerebellar dependent rotarod assay to a rescue of nuanced impairments in gait, which  
114 are being utilized as outcome measures in both AS models and AS individuals.

115         Following a dose range investigation using intra-cranial electroencephalography (EEG)  
116 recordings, we employed a battery of behavioral assays to evaluate the effect of systemic IGF-2 on social  
117 communication and several motor and learning outcomes in the mouse and rat models of AS. A  
118 subcutaneous injection was used to deliver IGF-2 to mice and rats 20 minutes prior to the start of testing.  
119 We utilized the standard behavioral protocol of our laboratory and IDDRC behavioral core [16, 47-54] as  
120 well as the published protocols of the Alberini laboratory [46] to compare data directly, fairly, and

121 congruently. A comprehensive battery of tests confirmed that IGF-2 did not change basic functions  
122 including physical characteristics, general behavioral responses, and sensory reflexes, which indicated  
123 safety. Disappointingly, however, our data did not provide strong support for reproducibility or inter-  
124 laboratory reliability of IGF-2's improvement on outcomes since we observed a general lack of effect of  
125 IGF-2 in several behavioral domains across two AS rodent models.

126

## 127 **Methods**

128

129 **Subjects.** All animals were housed in a temperature-controlled vivarium and provided food and water *ad*  
130 *libitum*. Animals were maintained on a 12:12 light-dark cycle with the exception of those used for EEG,  
131 which were maintained on a 14:10 light-dark cycle. All procedures were approved by the Institutional  
132 Animal Care and Use Committee of the University of California, Davis or the Baylor College of  
133 Medicine and conducted in accordance with the National Institutes of Health Guide for the Care and Use  
134 of Laboratory Animals. Mouse colonies were maintained by breeding *Ube3a* deletion males (B6.129S7-  
135 *Ube3a*<sup>tm1Alb</sup>/J; Jackson Laboratory, Bar Harbor, ME; Stock No. 016590) with congenic C57BL/6J (B6J)  
136 female mice, and rat colonies were maintained by breeding *Ube3a* deletion males with wildtype Sprague  
137 Dawley females (Envigo, Indianapolis, IN). Subject animals were generated by breeding *Ube3a* deletion  
138 females with wildtype males, producing maternally inherited *Ube3a* deletion animals (*Ube3a*<sup>mat-/pat+</sup>; mat-  
139 /pat+; Angelman Syndrome model) and wildtype littermate controls (*Ube3a*<sup>mat+/pat+</sup>; mat+/pat+).  
140 Additionally, a mixed-sex cohort of congenic B6J mice was generated from B6J breeder pairs and tested  
141 following methods previously described by Cruz et al. (2020) [46] and outlined again in **Supplementary**  
142 **File 1**.

143 Pups were marked for identification and genotyped as previously described [16, 55]. In order to  
144 minimize carry-over effects from repeated testing and handling, at least 24 hours were allowed to elapse  
145 between the end of one task and the start of another, and assays were performed in order of least to most  
146 stressful. [Group sizes for behavioral testing were determined based on previously observed phenotypes](#)

147 [and the field recommendation of 10-20 animals for a given task \[51\]](#). All behavioral testing included both  
148 sexes, was conducted blinded to genotype and treatment group, and was carried out between 08:00 and  
149 18:00 h (ZT1-ZT11) during the light phase. Between subjects, all surfaces of the testing apparatus were  
150 cleaned using 70% ethanol and allowed to dry. For assays involving bedding, the bedding was replaced  
151 between subjects. At least 1 hour prior to the start of behavioral testing, mice were habituated in their  
152 home cages to a dimly lit empty holding room adjacent to the testing area. Two cohorts of mice were  
153 tested as follows: Cohort 1 was sampled from 22 litters and, beginning at 8 weeks of age (PND 55), was  
154 tested in i) open field, ii) beam walking, iii) DigiGait, iv) novel object recognition, and v)  
155 pentylenetetrazol-induced seizures; Cohort 2 was sampled from 15 litters and beginning at 8 weeks of age  
156 were tested in i) accelerating rotarod and ii) marble burying. Two cohorts of rats were tested as follows:  
157 Cohort 1 was sampled from 6 litters and was tested in i) accelerating rotarod at PND  $38 \pm 4$ ; Cohort 2 was  
158 sampled from 7 litters and was tested in i) pup ultrasonic vocalizations at PND 10 and ii) pro-social USV  
159 playback at 9 weeks of age. One mixed-sex cohort of 7 rats was used for recording EEG at 1-2 months of  
160 age.

161  
162 **Systemic treatment with insulin-like growth factor-2 (IGF-2)**. IGF-2 (catalog #792-MG, R&D  
163 Systems, Inc., Minneapolis, MN) was dissolved in 0.1% bovine serum albumin (BSA) in phosphate-  
164 buffered saline (PBS). Prior to testing, a random number generator was used to randomly assign subjects  
165 of each genotype to receive either IGF-2 or vehicle (0.1% BSA-PBS). IGF-2 solutions were made fresh  
166 prior to every task and, for multi-day tests, injections were carried out only on the first training day. [The](#)  
167 [acute systemic dosing paradigm used herein was based on previous studies showing IGF-2 enhancing](#)  
168 [cognition \[42, 43\] and improving behavioral phenotypes of \*Ube3a\*<sup>mat-/pat+</sup> mice when administered 20 min](#)  
169 [prior to testing \[46\]](#). Therefore, for all behavioral tests, IGF-2 was delivered 20 min prior to the task. For  
170 optimal post-injection data quality while maintaining relevance to the timescale of behavioral tests, IGF-2  
171 was administered 60 min prior to EEG collection. A minimum of two days was allowed to elapse between  
172 injections. The 30  $\mu\text{g}/\text{kg}$  IGF-2 dose administered to rats was selected based on a dose response analysis

173 of EEG activity following administration of 10, 30, and 60  $\mu\text{g}/\text{kg}$  IGF-2 [in conjunction with previous data](#)  
174 [showing efficacy of 30  \$\mu\text{g}/\text{kg}\$  IGF-2 in \*Ube3a\*<sup>mat-/pat+</sup> mice \[46\]. We administered 30  \$\mu\text{g}/\text{kg}\$  IGF-2 to](#)  
175 match the dose previously found effective by Cruz et al. [46].

176

177 **Electroencephalography (EEG).** To acquire EEG recordings, rats were implanted with two subdural  
178 electrodes over the somatosensory cortex and one hippocampal depth electrode as previously described  
179 [\[56\]](#). Rats were anesthetized with isoflurane and positioned within a stereotaxic frame. The cortical  
180 recording electrodes were placed at -1.0 mm posterior and  $\pm$  3.0 mm lateral relative to bregma, while the  
181 hippocampal depth electrode was placed -4.0 mm posterior, +2.8 mm lateral, and -2.8 mm ventral.  
182 Metabond (Parkell, Edgewood, NY) and dental cement (Co-Oral-Ite Dental Mfg; Diamond Springs, CA)  
183 were used to secure all electrodes, except for the ground electrode which was sutured in the cervical  
184 paraspinous region. Electrodes were connected to the commutator via 6-channel pedestal and rats were  
185 given minimum 1 week recovery prior to data collection. For pain management, rats were provided with  
186 slow release buprenorphine and lidocaine/bupivacaine on the day of surgery, as well as Rimadyl tablets  
187 on the day prior to, the day of, and the day after surgery. Video synchronized EEG data was acquired  
188 using the Nicolet system (Natus, Pleasanton, CA) and Labchart V8 software (AD Instruments, Colorado  
189 Springs, CO) and then inspected and analyzed by a trained experimenter blinded to genotype and  
190 treatment group. Pre-injection baseline data (60 min in duration) were recorded from rats 24 hrs prior to  
191 administration of vehicle and post-injection data (60 min in duration) were collected 60 min following  
192 injection. Data were analyzed using repeated measures ANOVA with group as the between-group factor  
193 and frequency as the within-group factor or using two-way ANOVA with genotype and IGF-2 treatment  
194 as between-group factors.

195

196 **Behavioral Assays.**

197

198 ***Accelerating rotarod.*** To test motor coordination, balance, and motor learning, subjects were placed on  
199 an Ugo-Basile accelerating rotarod (Stoelting Co., Wood Dale, IL) as described previously in mice and  
200 rats [16, 47, 57]. Animals were placed on the cylinder while it rotated at 5 revolutions per minute, and  
201 then it slowly accelerated to 40 revolutions per min over the course of the 5 min trial. On three  
202 consecutive days, subjects were given three trials per day with a 45-60 min inter-trial rest period. The  
203 latency for each subject to fall off the cylinder was recorded with the maximum achievable latency being  
204 300 seconds. Data were analyzed using **three-way** ANOVA with **genotype and treatment** as the between-  
205 group factors and day as the within-group factor.

206  
207 ***Isolation-induced pup ultrasonic vocalizations (USV).*** On PND 10, neonatal rats were assessed by  
208 collecting 40 kHz vocalizations made when isolated from dam and littermates following a previously  
209 described protocol [16, 47, 57, 58]. Rat pups were selected from the nest at random and placed in a small  
210 plastic container with clean bedding. The container was placed inside a sound attenuating chamber for  
211 three min while calls were recorded with an ultrasonic microphone and Avisoft-RECORDER software  
212 (Avisoft Bioacoustics, Glienicke, Germany). Using spectrograms generated with Avisoft-SASLab Pro  
213 software, calls were manually counted by a trained investigator blinded to genotype and treatment group.  
214 Data were analyzed using two-way ANOVA with genotype and IGF-2 treatment as between-group  
215 factors.

216  
217 ***Pro-social USV playback.*** To evaluate social behavior, the behavioral response to hearing playback of  
218 natural conspecific 50-kHz USV social contact calls was quantified following an established protocol [16,  
219 47, 59]. Prior to the test, all subjects were handled in a standardized manner for 5 min on three  
220 consecutive days. Subjects were individually placed on an eight-arm radial maze (arms: 40 cm l x 10 cm  
221 w) elevated 48 cm above the floor, surrounded by a black curtain, and illuminated to ~8 lux with indirect  
222 white light. An active ultrasonic speaker (ScanSpeak, Avisoft Bioacoustics) was placed 20 cm away from  
223 the end of one arm while a second inactive speaker was placed symmetrically at the opposite arm to serve



224 as a visual control. After a 15-min habituation period, an Ultra SoundGate 116 Player (Avisoft  
225 Bioacoustics) was used to present one of two 1-min acoustic stimuli: (1) pro-social 50-kHz USV or (2) a  
226 time- and amplitude-matched white noise control stimulus. Following a 10-min inter-stimulus interval,  
227 the second stimulus was presented, and the test session ended after an additional 10-min post-stimulus  
228 period. The order of the stimuli was counterbalanced in order to account for possible sequence effects. An  
229 overhead camera and EthoVision XT videotracking software (Noldus Information Technology,  
230 Wageningen, Netherlands) were used to measure stimulus-induced changes in locomotion and location on  
231 the maze. Intact behavioral inhibition was defined as moving significantly less during the minute of white  
232 noise compared to the minute prior by paired *t*-test. Intact social approach was defined as spending  
233 significantly more time on the arms proximal to the active speaker compared to the distal arms during the  
234 minute of pro-social 50-kHz USV playback and subsequent two min by paired *t*-test. As a control metric  
235 for motor behavior, distance traveled during this timeframe (i.e., the minute of USV playback and  
236 subsequent two min) was also analyzed using two-way ANOVA with genotype and IGF-2 treatment as  
237 between-group factors.

238

239 ***Open field locomotion.*** General exploratory locomotion was assayed as previously described [55, 60, 61].  
240 Subjects were individually placed within a novel open field (40 cm l x 40 cm w x 30.5 cm h), which was  
241 dimly illuminated to ~30 lux, and allowing them to explore for 30 min. Photocell beam breaks were  
242 detected automatically by the VersaMax Animal Activity Monitoring System (AccuScan Instruments,  
243 Columbus, OH) to measure horizontal activity, vertical activity, and center time. Data were analyzed  
244 using two-way ANOVA with genotype and IGF-2 treatment as between-group factors.

245

246 ***Beam walking.*** A beam walking motor task was carried out by individually placing subjects at one end of  
247 a 59 cm long beam as described previously [60]. The beam was elevated 68 cm above a cushion and the  
248 time taken to cross the beam was measured. A darkened goal box (12 cm d cylinder) was placed on the  
249 far end of the beam in order to provide motivation to walk across. On the first day, three training trials on

250 a large diameter (35 mm) beam were conducted to allow animals to become accustomed to the task.  
251 Animals that had scores of 60 seconds on all three trials were excluded from analysis. On the following  
252 day, subjects were placed back on the large diameter beam and then on a beam of intermediate width (18  
253 mm d) before being placed onto the test beam, which was the narrowest and therefore most challenging  
254 (13 mm d). Two trials per beam were carried out with an inter-trial rest interval of at least 30 minutes and  
255 trial duration was capped at a maximum of 60 seconds. The two-trial average latency to traverse the test  
256 beam was recorded and data were analyzed via two-way ANOVA with genotype and IGF-2 treatment as  
257 between-group factors.

258

259 **Marble burying.** To evaluate marble burying, twenty black glass marbles (15 mm d) were arranged in a 4  
260 x 5 grid on top of 4 cm of clean bedding within a standard mouse cage (27 cm l x 16.5 cm w x 12.5 cm h)  
261 following a protocol similar to those described previously [49, 62]. Subjects were individually placed in  
262 the center of the cage and allowed to explore for 20 min. The testing room was dimly illuminated to ~15  
263 lux. The number of marbles buried (defined as at least 50% covered by the bedding) at the end of the test  
264 session was recorded. Data were analyzed using two-way ANOVA with genotype and IGF-2 treatment as  
265 between-group factors.

266

267 **Pentylentetrazol-induced seizures.** Susceptibility to primary generalized seizures was behaviorally  
268 assessed by systemically administering 80 mg/kg pentylentetrazol (PTZ; a GABA<sub>A</sub> receptor antagonist)  
269 via intraperitoneal injection and observing the timing and progression of the subsequent convulsions  
270 following a protocol described previously [55, 63, 64]. Immediately following injection of PTZ, animals  
271 were individually placed in a clean empty standard mouse cage (27 cm l x 16.5 cm w x 12.5 cm h) and  
272 watched carefully by a trained observer blinded to genotype and treatment condition. The latency to  
273 generalized clonus was recorded and analyzed using two-way ANOVA with genotype and IGF-2  
274 treatment as between-group factors.

275

276 **Novel object recognition (NOR).** Learning and memory were tested by individually presenting subjects  
277 with two identical objects and later testing their ability to recognize the familiar object over a novel one  
278 using an established protocol previously described [49, 53, 60, 65]. The NOR assay was carried out  
279 within an opaque matte white arena (41 cm l x 41 cm w x 30 cm h) in a 30-lux room and consisted of five  
280 phases: a 30-min habituation to the arena on the day prior to the test, a 10-min habituation to the arena on  
281 the test day, a 10-min object familiarization session, a 60-min isolation period, and a 5-min object  
282 recognition test. Following the 10-min habituation on the day of the test, each animal was removed from  
283 the arena and placed in an individual clean holding cage while two clean identical objects were placed  
284 inside the arena. Each subject was then returned to its arena and allowed to explore and familiarize with  
285 the objects for 10 min. Subjects were then returned to their holding cages and placed in a nearby low light  
286 holding area outside of the testing room. The arenas were cleaned, let dry, and one clean familiar object  
287 and one clean novel object were placed inside the arena where the two identical objects had previously  
288 been located. After a 60 min interval, subjects were returned to their arenas and allowed to explore the  
289 objects for 5 min. Time spent investigating each object was measured using EthoVision XT videotracking  
290 software (Noldus Information Technology) and validated by manual scoring by a trained observer blinded  
291 to genotype and treatment group. Object investigation was defined as time spent sniffing the object when  
292 the nose was within 2 cm of the object and oriented toward the object. Animals who did not spend at least  
293 5 sec sniffing the objects during the familiarization phase were removed from analysis and recognition  
294 memory was defined as spending significantly more time investigating the novel object compared to the  
295 familiar object by paired *t*-test within group. Object preference was calculated as time spent sniffing the  
296 novel object compared to total time sniffing both objects. Fifty percent represents equal time investigating  
297 the novel and familiar object (a lack of preference) whereas >50% demonstrates intact recognition  
298 memory.

299

300 **DigiGait.** Gait metrics were collected using the DigiGait automated treadmill system and analysis  
301 software (Mouse Specifics, Inc., Framingham, MA). Subjects were placed individually into the enclosed

302 treadmill chamber and allowed to acclimate before the belt was turned on and the speed was slowly  
303 increased from 5 cm/sec to a constant speed of 20 cm/sec. For each subject, 3-6 sec of clearly visible  
304 consecutive strides at the belt speed of 20 cm/sec was recorded. Gait analysis was conducted using the  
305 DigiGait software package and was carried out by an experimenter blinded to genotype and treatment  
306 condition. Right and left fore- and hindlimbs were averaged together. Data were analyzed per limb set  
307 using two-way ANOVA with genotype and IGF-2 treatment as between-group factors.

308

309 **Statistical Analysis.** All statistical analyses were carried out using Prism 9 software (GraphPad Software,  
310 San Diego, CA). All significance levels were set at  $p < 0.05$  and all  $t$ -tests were two-tailed. Outliers were  
311 identified and excluded using Grubb's test and D'Agostino & Pearson tests were used to check  
312 assumptions of normality. Two-way ANOVAs were used to analyze the effects of both genotype and  
313 IGF-2 treatment and two-way repeated measures ANOVAs were used for comparisons across time points.  
314 **Three-way ANOVAs were used to analyze the effects of genotype, treatment, as well as time.** Paired  $t$ -  
315 tests were used for comparisons within a single group. Subsequent to ANOVAs, *post hoc* testing  
316 controlling for multiple comparisons was carried out using Sidak's or Tukey's multiple comparisons test.  
317 Since the overall goal of the study was to evaluate the potential for IGF-2 to ameliorate behavioral  
318 deficits, emphasis was placed on i) the comparison between wildtype  $Ube3a^{mat+/pat+}$  vehicle and  $Ube3a^{mat-}$   
319  $/pat+$  vehicle to confirm the genotype deficit and ii) the comparison between  $Ube3a^{mat-/pat+}$  vehicle and  
320  $Ube3a^{mat-/pat+}$  IGF-2 to identify any effect of IGF-2 treatment on the deficit. Data are presented as mean  $\pm$   
321 standard error of the mean (S.E.M.) unless otherwise noted and detailed statistics are described in

322 **Supplementary File 2. No significant sex differences were detected so data from both sexes were pooled**  
323 **together.**

324

325 **Results**

326

327 **IGF-2 reduced cortical and hippocampal delta power in in *Ube3a*<sup>mat-/pat+</sup> rats.** Since *Ube3a*<sup>mat-/pat+</sup> rats  
328 display the elevation in EEG delta power that is characteristic of AS [56], we sought to examine whether  
329 this core phenotype could be normalized by IGF-2. Prior to treatment, we used cortical and hippocampal  
330 electrodes to conduct spectral power analyses in *Ube3a*<sup>mat-/pat+</sup> rats, which revealed elevations in the delta  
331 range (1-4 Hz), although when analyzed across the entire frequency range, the effect of genotype was not  
332 statistically significant (**Fig. 1A**;  $F_{\text{Genotype}}, p>0.05$ ;  $F_{\text{Frequency}}, p<0.0001$ ;  $F_{\text{G}\times\text{F}}, p>0.05$ ; **Fig. 1B**;  $F_{\text{Genotype}},$   
333  $p>0.05$ ;  $F_{\text{Frequency}}, p<0.0001$ ;  $F_{\text{G}\times\text{F}}, p>0.05$ ). In wildtype rats, treatment with IGF-2 did not influence  
334 cortical power (**Fig. 1C**;  $F_{\text{Genotype}}, p>0.05$ ;  $F_{\text{Frequency}}, p<0.0001$ ;  $F_{\text{G}\times\text{F}}, p>0.05$ ) or hippocampal power (**Fig.**  
335 **1D**;  $F_{\text{Genotype}}, p>0.05$ ;  $F_{\text{Frequency}}, p<0.0001$ ;  $F_{\text{G}\times\text{F}}, p>0.05$ ). In *Ube3a*<sup>mat-/pat+</sup> rats, however, treatment with  
336 IGF-2 reduced cortical power at 1, 2, 3, and 4 Hz (**Fig. 1E**;  $F_{\text{Genotype}}, p>0.05$ ;  $F_{\text{Frequency}}, p<0.0001$ ;  
337  $F_{\text{G}\times\text{F}}, p<0.0001$ ). At 1 and 2 Hz, all doses of IGF-2 reduced cortical delta power in *Ube3a*<sup>mat-/pat+</sup> compared  
338 to vehicle (10  $\mu\text{g}/\text{kg}$  IGF-2,  $p<0.0001$ ; 30  $\mu\text{g}/\text{kg}$  IGF-2,  $p<0.0001$ ; 60  $\mu\text{g}/\text{kg}$  IGF-2,  $p<0.0001$ ). At 3 Hz,  
339 cortical delta power was reduced by 10  $\mu\text{g}/\text{kg}$  IGF-2 ( $p<0.0001$ ), 30  $\mu\text{g}/\text{kg}$  IGF-2 ( $p<0.0001$ ), and 60  
340  $\mu\text{g}/\text{kg}$  IGF-2 ( $p=0.027$ ) and was reduced at 4 Hz by 10  $\mu\text{g}/\text{kg}$  IGF-2 ( $p=0.002$ ) and 30  $\mu\text{g}/\text{kg}$  IGF-2  
341 ( $p=0.021$ ) but not by 60  $\mu\text{g}/\text{kg}$  IGF-2 ( $p>0.05$ ). Despite trending reductions, hippocampal delta power was  
342 not affected by IGF-2 treatment in *Ube3a*<sup>mat-/pat+</sup> rats (**Fig. 1F**; ;  $F_{\text{Genotype}}, p>0.05$ ;  $F_{\text{Frequency}}, p<0.0001$ ;  
343  $F_{\text{G}\times\text{F}}, p>0.05$ ).

344 To more closely examine dose differences on the EEG phenotype of *Ube3a*<sup>mat-/pat+</sup> rats, we  
345 analyzed each dose's effect on summed power at 1 and 2 Hz ("delta power"). These two frequencies were  
346 of main interest due to peak signal strength across our spectral analyses as well as previous work that  
347 identified 1-2 Hz as showing the most persistent difference between *Ube3a*<sup>mat-/pat+</sup> and wildtype rats [56].  
348 We found no effect of IGF-2 on delta power in wildtype but cortical delta power in *Ube3a*<sup>mat-/pat+</sup> rats was  
349 reduced following treatment with 10 or 30  $\mu\text{g}/\text{kg}$  IGF-2 (**Fig. 1G**;  $F_{\text{Genotype}}, p>0.05$ ;  $F_{\text{Treatment}}, p=0.031$ ;  
350  $F_{\text{G}\times\text{F}}, p=0.039$ ; IGF-2 vs. vehicle, 10  $\mu\text{g}/\text{kg}$ ,  $p=0.008$ ; 30  $\mu\text{g}/\text{kg}$ ,  $p=0.015$ ; 60  $\mu\text{g}/\text{kg}$ ,  $p>0.05$ ).  
351 Hippocampal delta power did not differ by genotype but was reduced by treatment with 10 or 30  $\mu\text{g}/\text{kg}$   
352 IGF-2 (**Fig. 1H**;  $F_{\text{Genotype}}, p>0.05$ ;  $F_{\text{Treatment}}, p=0.027$ ;  $F_{\text{G}\times\text{F}}, p>0.05$ ; IGF-2 vs. vehicle, 10  $\mu\text{g}/\text{kg}$ ,  $p=0.045$ ;

353 30  $\mu\text{g}/\text{kg}$ ,  $p=0.045$ ; 60  $\mu\text{g}/\text{kg}$ ,  $p>0.05$ ). Overall, both 10 and 30  $\mu\text{g}/\text{kg}$  IGF-2 showed promising effects to  
354 reduce the elevated delta power of  $Ube3a^{\text{mat-}/\text{pat+}}$  rats in both the cortex and hippocampus. In selecting a  
355 dose to investigate in subsequent behavioral testing of rats, we also considered the demonstrated efficacy  
356 of 30  $\mu\text{g}/\text{kg}$  IGF-2 in previous studies of IGF-2 [46] and therefore opted to use this dose in rats moving  
357 forward.

358

359 **IGF-2 did not improve motor learning or social communication in  $Ube3a^{\text{mat-}/\text{pat+}}$  rats.** In order to  
360 assess whether IGF-2 could ameliorate the robust motor learning deficit of  $Ube3a^{\text{mat-}/\text{pat+}}$  rats, we tested  
361  $Ube3a^{\text{mat-}/\text{pat+}}$  and wildtype littermate controls ( $Ube3a^{\text{mat+}/\text{pat+}}$ ) with IGF-2 or vehicle treatment on an  
362 accelerating rotarod (**Fig. 2A**). The motor learning deficit of  $Ube3a^{\text{mat-}/\text{pat+}}$  rats was apparent across the  
363 three day task, although it was unaffected by treatment with IGF-2 ( $F_{\text{Genotype}}$ ,  $p=0.038$ ;  $F_{\text{Treatment}}$ ,  $p>0.05$ ;  
364  $F_{\text{Time}}$ ,  $p<0.0001$ ;  $F_{\text{G}\times\text{Tr}}$ ,  $p>0.05$ ;  $F_{\text{G}\times\text{Ti}}$ ,  $p<0.0001$ ;  $F_{\text{Tr}\times\text{Ti}}$ ,  $p>0.05$ ;  $F_{\text{G}\times\text{Ti}\times\text{Tr}}$ ,  $p>0.05$ ). While the wildtype  
365 vehicle and wildtype IGF-2 groups significantly improved their performance from session 1 to 3 (by  
366 142% and 118%, respectively), both the  $Ube3a^{\text{mat-}/\text{pat+}}$  vehicle and  $Ube3a^{\text{mat-}/\text{pat+}}$  IGF-2 groups failed to  
367 improve over the course of the test ( $Ube3a^{\text{mat+}/\text{pat+}}$  vehicle,  $p=0.003$ ;  $Ube3a^{\text{mat+}/\text{pat+}}$  IGF-2,  $p=0.002$ ;  
368  $Ube3a^{\text{mat-}/\text{pat+}}$  vehicle,  $p>0.05$ ;  $Ube3a^{\text{mat-}/\text{pat+}}$  IGF-2,  $p>0.05$ ), in contrast to the recent report by Cruz et al.  
369 [46].

370 We also evaluated the effect of IGF-2 on social communication outcomes, both at an early  
371 postnatal timepoint and during adulthood.  $Ube3a^{\text{mat-}/\text{pat+}}$  rats emitted 37% fewer isolation-induced pup  
372 USV at PND 10 compared to wildtype, reproducing our earlier publication [16], but IGF-2 had no effect  
373 on the calling rate (**Fig. 2B**;  $F_{\text{Genotype}}$ ,  $p<0.0001$ ;  $F_{\text{Treatment}}$ ,  $p>0.05$ ;  $F_{\text{G}\times\text{T}}$ ,  $p>0.05$ ). Then in adulthood, we  
374 used a USV playback paradigm to present subjects with pro-social 50-kHz USV and a time- and  
375 amplitude-matched white noise acoustic control (**Fig. 2C**). All groups, regardless of genotype or  
376 treatment, exhibited the expected behavioral inhibition in response to the noise control wherein they  
377 moved less during playback of the noise compared to pre-noise baseline exploration, indicating intact  
378 hearing abilities ( $Ube3a^{\text{mat+}/\text{pat+}}$  vehicle,  $p<0.001$ ;  $Ube3a^{\text{mat+}/\text{pat+}}$  IGF-2,  $p<0.001$ ;  $Ube3a^{\text{mat-}/\text{pat+}}$  vehicle,

379  $p < 0.0001$ ;  $Ube3a^{mat-/pat+}$  IGF-2,  $p < 0.0001$ ). This is further supported by the observation of equivalent  
380 levels of locomotion in all groups following initiation of 50-kHz USV playback (data not shown; two-  
381 way ANOVA:  $F_{Genotype}$ ,  $p > 0.05$ ;  $F_{Treatment}$ ,  $p > 0.05$ ;  $F_{G \times T}$ ,  $p > 0.05$ ). In response to the pro-social 50-kHz  
382 USV, only the wildtype vehicle and wildtype IGF-2 groups showed the typical social approach response  
383 by spending more time on the arms proximal to the speaker compared to the distal arms (**Fig. 2D**;  
384  $Ube3a^{mat+/pat+}$  vehicle,  $p = 0.004$ ;  $Ube3a^{mat+/pat+}$  IGF-2,  $p = 0.045$ ). Both the  $Ube3a^{mat-/pat+}$  vehicle and  
385  $Ube3a^{mat-/pat+}$  IGF-2 groups failed to show a preference for the proximal arms in response to the USV  
386 ( $Ube3a^{mat-/pat+}$  vehicle,  $p > 0.05$ ;  $Ube3a^{mat-/pat+}$  IGF-2,  $p > 0.05$ ), reproducing our earlier publication [16].  
387 Given no differences in the response to a non-social stimulus and the absence of a motor impairment, the  
388 reduced social approach response in both groups of  $Ube3a^{mat-/pat+}$  rats reveals a social communication  
389 deficit that is not ameliorated by treatment with IGF-2.

390

391 **IGF-2 did not markedly improve motor deficits, seizure threshold, or object recognition in**  
392  **$Ube3a^{mat-/pat+}$  mice.** Next, we examined the ability of IGF-2 to improve the known behavioral deficits of  
393  $Ube3a^{mat-/pat+}$  mice. While  $Ube3a^{mat-/pat+}$  mice showed strong motoric deficits, performance was not  
394 affected by treatment with IGF-2. First, exploration of a novel open arena was used to assess overall  
395 locomotive activity. Horizontal activity, which was 44% lower in  $Ube3a^{mat-/pat+}$  mice than wildtype  
396 littermates, was not affected by IGF-2 (**Fig. 3A**;  $F_{Genotype}$ ,  $p < 0.0001$ ;  $F_{Treatment}$ ,  $p > 0.05$ ;  $F_{G \times T}$ ,  $p > 0.05$ ). A  
397 similar pattern was observed for vertical activity wherein  $Ube3a^{mat-/pat+}$  mice showed 60% less rearing and  
398 vertical movement compared to wildtype, but this was unaffected by IGF-2 (**Fig. 3B**;  $F_{Genotype}$ ,  $p < 0.0001$ ;  
399  $F_{Treatment}$ ,  $p > 0.05$ ;  $F_{G \times T}$ ,  $p > 0.05$ ). There was no genotype difference or effect of IGF-2 on time spent in the  
400 center of the open field (**Fig. 3C**;  $F_{Genotype}$ ,  $p > 0.05$ ;  $F_{Treatment}$ ,  $p > 0.05$ ;  $F_{G \times T}$ ,  $p > 0.05$ ). These data were  
401 similar to the recent Cruz et al. report [46].

402 We also assessed balance and motor coordination using a beam walking task but found that IGF-2  
403 did not have an enhancing effect in wildtypes nor ameliorated motor coordination deficits observed in the  
404  $Ube3a^{mat-/pat+}$  group.  $Ube3a^{mat-/pat+}$  mice took longer to cross compared to wildtype littermates regardless of

405 treatment with IGF-2 (**Fig. 3D**;  $F_{\text{Genotype}}, p=0.016$ ;  $F_{\text{Treatment}}, p>0.05$ ;  $F_{\text{G}\times\text{T}}, p>0.05$ ). However, in the  
406 accelerating rotarod task of motor coordination, we were able to detect a moderate effect of IGF-2 in  
407 *Ube3a*<sup>mat-/pat+</sup> mice (**Fig. 3E**;  $F_{\text{Genotype}}, p<0.0001$ ;  $F_{\text{Treatment}}, p=0.006$ ;  $F_{\text{Time}}, p<0.0001$ ;  $F_{\text{G}\times\text{Tr}}, p>0.05$ ;  
408  $F_{\text{G}\times\text{Ti}}, p=0.007$ ;  $F_{\text{Tr}\times\text{Ti}}, p>0.05$ ;  $F_{\text{G}\times\text{Ti}\times\text{Tr}}, p>0.05$ ). While *Ube3a*<sup>mat-/pat+</sup> mice had poorer performance than  
409 wildtypes, falling off earlier on test days 1 and 2 (*Ube3a*<sup>mat+/pat+</sup> vehicle vs. *Ube3a*<sup>mat-/pat+</sup> vehicle, day 1,  
410  $p<0.001$ ; day 2,  $p=0.008$ ; day 3,  $p>0.05$ ), *Ube3a*<sup>mat-/pat+</sup> mice treated with IGF-2 only showed a deficit on  
411 the first day of testing (*Ube3a*<sup>mat+/pat+</sup> vehicle vs. *Ube3a*<sup>mat-/pat+</sup> IGF-2, day 1,  $p=0.047$ ; day 2,  $p>0.05$ ; day  
412 3,  $p>0.05$ ). The effect, however, was only moderate in that the *Ube3a*<sup>mat-/pat+</sup> IGF-2 group was not  
413 significantly better than the *Ube3a*<sup>mat-/pat+</sup> vehicle group on any day (*Ube3a*<sup>mat-/pat+</sup> vehicle vs. *Ube3a*<sup>mat-/pat+</sup>  
414 IGF-2, day 1,  $p>0.05$ ; day 2,  $p>0.05$ ; day 3,  $p>0.05$ ).

415 In the marble burying assay, *Ube3a*<sup>mat-/pat+</sup> mice covered 88% fewer marbles compared to wildtype  
416 littermates but there was no effect of IGF-2 treatment in either group ((**Fig. 3F**;  $F_{\text{Genotype}}, p<0.0001$ ;  
417  $F_{\text{Treatment}}, p>0.05$ ;  $F_{\text{G}\times\text{T}}, p>0.05$ ). As described in previous reports, our laboratory interprets the lack of  
418 marble burying as a function of the low motor activity of AS mice, as opposed to traditional  
419 interpretations of anxiety-like or repetitive behavior used by other AS laboratories [66]. In a fully capable,  
420 typically active mouse, marble burying may hold more meaning, however, after more than five years of  
421 focused study on these mice, we cannot delineate the motor impairments related to marble burying. We  
422 also investigated IGF-2's influence on seizure threshold in *Ube3a*<sup>mat-/pat+</sup> mice using the chemo-convulsant  
423 pentelenetetrazol. While *Ube3a*<sup>mat-/pat+</sup> mice exhibited a reduced latency to generalized clonus seizure,  
424 latency to seize was unaffected by IGF-2 treatment (**Fig. 3G**;  $F_{\text{Genotype}}, p>0.0001$ ;  $F_{\text{Treatment}}, p>0.05$ ;  
425  $F_{\text{G}\times\text{T}}, p>0.05$ ). *Ube3a*<sup>mat-/pat+</sup> mice were 53% quicker to seize than wildtype.

426 To test the cognition enhancing capabilities of IGF-2 treatment, we evaluated novel object  
427 recognition with a standard protocol and found that all groups, regardless of genotype or treatment,  
428 demonstrated intact novel object recognition (**Fig. 3H**). Within each group, more time was spent more  
429 time investigating the novel object compared to the familiar one (*Ube3a*<sup>mat+/pat+</sup> vehicle,  $p<0.001$ ;  
430 *Ube3a*<sup>mat+/pat+</sup> IGF-2,  $p=0.001$ ; *Ube3a*<sup>mat-/pat+</sup> vehicle,  $p=0.006$ ; *Ube3a*<sup>mat-/pat+</sup> IGF-2,  $p=0.006$ ). In addition



431 to the dichotomous yes/no analysis of object recognition, we also explored whether IGF-2 influenced the  
432 continuous metric of object preference. There were no differences, however, in percent preference for the  
433 novel object across genotypes or treatment (**Fig. 3I**;  $F_{\text{Genotype}}, p>0.05$ ;  $F_{\text{Treatment}}, p>0.05$ ;  $F_{\text{G}\times\text{T}}, p>0.05$ ). To  
434 facilitate more direct comparisons with the results of Cruz et al. (2020), we also **utilized** their novel object  
435 recognition protocol within our own laboratory. We found, however, that **IGF-2** failed to elicit  
436 recognition memory in congenic C57BL/6J mice, the background strain of the *Ube3a*<sup>mat-/pat+</sup> mouse model  
437 (**Fig. S1**). Concomitantly, using the **experimental paradigm** of Cruz et al. [46], we observed that IGF-2  
438 treatment did not affect the cognitive performance of C57BL/6J mice in the **delayed** contextual fear  
439 conditioning task (**Fig. S1**).

440 As an innovative and unique investigation of nuanced motor phenotypes, we probed for any  
441 effect of IGF-2 on several metrics of gait using the automated DigiGait system. While walking on a  
442 treadmill, *Ube3a*<sup>mat-/pat+</sup> mice took wider, longer, and fewer steps compared to wildtype littermates. The  
443 elevated forelimb and hindlimb stance widths exhibited by *Ube3a*<sup>mat-/pat+</sup> mice were not affected by IGF-2  
444 treatment (**Fig. 4A**; fore:  $F_{\text{Genotype}}, p<0.0001$ ;  $F_{\text{Treatment}}, p=0.046$ ;  $F_{\text{G}\times\text{T}}, p>0.05$ ; *Ube3a*<sup>mat+/pat+</sup> vehicle vs.  
445 *Ube3a*<sup>mat-/pat+</sup> vehicle,  $p=0.005$ ; *Ube3a*<sup>mat-/pat+</sup> vehicle vs. *Ube3a*<sup>mat-/pat+</sup> IGF-2,  $p>0.05$ ; hind:  $F_{\text{Genotype}},$   
446  $p<0.001$ ;  $F_{\text{Treatment}}, p>0.05$ ;  $F_{\text{G}\times\text{T}}, p>0.05$ ). Additionally, the longer forelimb and hindlimb stride lengths  
447 were further increased by IGF-2 (**Fig. 4B**; fore:  $F_{\text{Genotype}}, p<0.0001$ ;  $F_{\text{Treatment}}, p=0.031$ ;  $F_{\text{G}\times\text{T}}, p=0.038$ ;  
448 *Ube3a*<sup>mat+/pat+</sup> vehicle vs. *Ube3a*<sup>mat-/pat+</sup> vehicle,  $p<0.001$ ; *Ube3a*<sup>mat-/pat+</sup> vehicle vs. *Ube3a*<sup>mat-/pat+</sup> IGF-2,  
449  $p=0.021$ ; hind:  $F_{\text{Genotype}}, p<0.0001$ ;  $F_{\text{Treatment}}, p>0.05$ ;  $F_{\text{G}\times\text{T}}, p=0.023$ ; *Ube3a*<sup>mat+/pat+</sup> vehicle vs. *Ube3a*<sup>mat-/pat+</sup>  
450 vehicle,  $p<0.0001$ ; *Ube3a*<sup>mat-/pat+</sup> vehicle vs. *Ube3a*<sup>mat-/pat+</sup> IGF-2,  $p=0.031$ ). IGF-2 also led to further  
451 reduction of forelimb stride frequency and did not have an effect on the reduced hindlimb stride  
452 frequency displayed by *Ube3a*<sup>mat-/pat+</sup> mice (**Fig. 4C**; fore:  $F_{\text{Genotype}}, p<0.0001$ ;  $F_{\text{Treatment}}, p>0.05$ ;  
453  $F_{\text{G}\times\text{T}}, p>0.05$ ; *Ube3a*<sup>mat+/pat+</sup> vehicle vs. *Ube3a*<sup>mat-/pat+</sup> vehicle,  $p<0.001$ ; *Ube3a*<sup>mat-/pat+</sup> vehicle vs. *Ube3a*<sup>mat-</sup>  
454 <sup>/pat+</sup> IGF-2,  $p=0.021$ ; hind:  $F_{\text{Genotype}}, p<0.0001$ ;  $F_{\text{Treatment}}, p>0.05$ ;  $F_{\text{G}\times\text{T}}, p>0.05$ ). Interestingly, IGF-2 had  
455 varying effects on the time taken to propel each step: the elevated propulsion time required by *Ube3a*<sup>mat-</sup>  
456 <sup>/pat+</sup> mice, indicative of limb weakness, was unaffected by IGF-2 in the forelimbs while further elevated by

457 IGF-2 in the hindlimbs, whose function is largely force generation and propulsion (**Fig. 4D**; fore:  $F_{\text{Genotype}}$ ,  
458  $p < 0.0001$ ;  $F_{\text{Treatment}}$ ,  $p > 0.05$ ;  $F_{\text{G} \times \text{T}}$ ,  $p > 0.05$ ; hind:  $F_{\text{Genotype}}$ ,  $p < 0.0001$ ;  $F_{\text{Treatment}}$ ,  $p > 0.05$ ;  $F_{\text{G} \times \text{T}}$ ,  $p = 0.014$ ;  
459  $Ube3a^{\text{mat+}/\text{pat+}}$  vehicle vs.  $Ube3a^{\text{mat-}/\text{pat+}}$  vehicle,  $p = 0.003$ ;  $Ube3a^{\text{mat+}/\text{pat+}}$  vehicle vs.  $Ube3a^{\text{mat-}/\text{pat+}}$  IGF-2,  
460  $p = 0.032$ ). In alignment with taking longer steps,  $Ube3a^{\text{mat-}/\text{pat+}}$  mice held their fore and hindlimbs in a  
461 swing state off the ground longer than wildtypes, although neither metric was changed by IGF-2 treatment  
462 (**Fig. 4E**; fore:  $F_{\text{Genotype}}$ ,  $p < 0.0001$ ;  $F_{\text{Treatment}}$ ,  $p > 0.05$ ;  $F_{\text{G} \times \text{T}}$ ,  $p > 0.05$ ; hind:  $F_{\text{Genotype}}$ ,  $p < 0.0001$ ;  $F_{\text{Treatment}}$ ,  
463  $p > 0.05$ ;  $F_{\text{G} \times \text{T}}$ ,  $p > 0.05$ ). Finally, despite increased propulsion and swing times,  $Ube3a^{\text{mat-}/\text{pat+}}$  mice spent a  
464 normal amount of time braking, which was unchanged by IGF-2 treatment (**Fig. 4F**; fore:  $F_{\text{Genotype}}$ ,  
465  $p > 0.05$ ;  $F_{\text{Treatment}}$ ,  $p > 0.05$ ;  $F_{\text{G} \times \text{T}}$ ,  $p > 0.05$ ; hind:  $F_{\text{Genotype}}$ ,  $p > 0.05$ ;  $F_{\text{Treatment}}$ ,  $p > 0.05$ ;  $F_{\text{G} \times \text{T}}$ ,  $p > 0.05$ ).

466

## 467 Discussion

468

469 Novel data uncovered by this work illustrated that acute systemic administration of IGF-2  
470 reduced delta spectral power in EEG, a theorized biomarker in AS. This was a very promising initial  
471 finding, considering newly published data linking delta power to improvements in the Bayley Cognitive  
472 Assessment [67], however, disappointingly, the overwhelming majority of metrics for motor behavior,  
473 learning, and coordination were unaffected and IGF-2 did not improve pup social communication, seizure  
474 threshold, cognition, or gait. Although our study returned mostly negative results regarding the potential  
475 for IGF-2 to improve behavioral deficits in AS, our findings are nevertheless important to disseminate, as  
476 they contrast other reports [46]. While we were aiming to corroborate the previous reports of IGF-2  
477 efficacy, as inter-laboratory reproducibility is a long-standing goal of ours, we did establish strong  
478 reproducibility with other rat studies [16, 68-70], EEG and sleep studies [69, 71-74], and other genetic  
479 mutant mouse models of neurodevelopmental disorders [48, 53, 75]. Furthermore, we did reproduce a  
480 number of the  $Ube3a^{\text{mat-}/\text{pat+}}$  mouse phenotypes observed by Cruz et al., specifically hypolocomotion,  
481 fewer marbles buried, and poor rotarod performance [46].

482 We observed a moderate effect of IGF-2 on day 1 of rotarod testing in *Ube3a*<sup>mat-/pat+</sup> mice, but this  
483 did not extend across the rotarod time course that addresses motor learning and it was non-existent in  
484 *Ube3a*<sup>mat-/pat+</sup> rats. However, we were able to replicate all of the *Ube3a*<sup>mat-/pat+</sup> mouse and rat model deficits  
485 previously reported by our groups [16, 56, 72, 76] and discover significant reduction of the elevated delta  
486 power in *Ube3a*<sup>mat-/pat+</sup> EEG by IGF-2 treatment. This is the first report of detection of alterations in EEG  
487 power spectral density (PSD) without any behavioral phenotypic change. One potential explanation as to  
488 why we observed effects on EEG activity but no changes in behavioral performance is that the increase in  
489 delta power may not have substantial behavioral significance. To our knowledge, there is still little data  
490 showing that delta power is strongly tied to behavioral outcomes, despite many laboratories' working  
491 hypothesis that PSDs are effective biomarkers [69, 74, 77-80]. However, we find this explanation unlikely  
492 in light of recent evidence from our laboratory illustrating reductions delta power with concomitant  
493 behavioral improvements [81] and a new report in humans with Angelman Syndrome [67].

494 Given that we were unable to reproduce, nor extend, the broad phenotypic rescue shown in earlier  
495 work, it is critical to highlight that our study employed standardized experimental protocols for behavioral  
496 testing [51, 82, 83], which differed from those used by Cruz et al. (2020) [46]. We had aimed to leverage  
497 these protocol differences to show that the effects of IGF-2 treatment were robust enough to carry across  
498 laboratories and therefore bode well for translation to the clinic. Inter-laboratory methodological  
499 discrepancies included rotarod inter-trial interval duration, open field lighting and duration, marble  
500 burying experimental design and analysis, as well as object exploration times and post-training delays.  
501 When observing latencies, we did not record scores that exceeded the duration of the test (e.g., Figure 4,  
502 Cruz et al., 2020). Additionally, while our washout period was shorter compared to previous work, we do  
503 not suspect that this hindered our ability to detect effects of IGF-2 since we did not find evidence of IGF-  
504 2 having an effect greater than one day in duration. Furthermore, if our washout period had been  
505 inadequate, the compounding effects of IGF-2 would have been revealed in subsequent testing. However,  
506 this was not the case and for each cohort of animals tested, the final assay of the test battery revealed no  
507 effect of IGF-2. Arguably, one of the most crucial methodological details that sets our behavioral

508 experiments apart from those conducted previously is our large sample sizes, which were upwards of 25  
509 animals per group. Pooling data from small subgroups (i.e.,  $n=3-4$ /group as used by Cruz et al.) can  
510 artificially inflate error rates (i.e., produce false positives and negatives) due to the high risk of “testing  
511 until significance,” particularly when group sizes are not pre-determined [50, 51, 54, 83]. Pooling  
512 subgroups also requires that all groups be subjected to the same exact conditions (e.g., same sequence of  
513 prior tests, identical test parameters) and that scores from the various subgroups (particularly wildtype)  
514 are confirmed to be similar to each other. Rather than subgroups, it is recommended practice in rodent  
515 behavioral testing to use full groups consisting of 10 to 20 animals for a given experiment [51, 83]. We,  
516 therefore, only used small groups in the collection of initial pilot data and we used large cohorts with  
517 enough subjects per group to achieve robust statistical power for collection of behavioral data. The novel  
518 object recognition findings in the prior report utilized a protocol which i) we used in congenic B6J mice  
519 but were unable to reproduce previous results (i.e., there was not recognition as defined by greater time  
520 spent with novel vs. familiar object) and ii) does not appear congruent with many of the best  
521 recommended practices disseminated by the IDDRRC behavioral working group (e.g., maximizing  
522 experimenter consistency, ensuring no intrinsic object preference, and using new object pairs when re-  
523 testing animals) [84].

524 Our study was thorough and unique, as we used two different model species and statistically  
525 powerful, large sample sizes, and we investigated the strongest reported phenotypes in the established  
526 models. Our dual species approach allowed us to measure social communication in the rat, which exhibits  
527 more nuanced social behavior and employs a more sophisticated communication system as compared to  
528 the mouse, and we leveraged the mouse model for its strong motor phenotypes. Because our rotarod  
529 paradigm consisted of three consecutive days, we were able to assess motor learning and not just use it to  
530 test motor function. Having both of these metrics available in both species was key as wildtype mice  
531 exhibited a ceiling effect that impeded interpretation of a motor learning deficit, but we were able to  
532 evaluate this outcome in rats since their performance changed significantly across test days. By

533 comparing results across species, and across tests within the same behavioral domain, we are able to  
534 provide a more thorough and convincing assessment of this IGF-2 treatment paradigm.

535 While we did see a few promising trends in EEG and rotarod, we also detected effects on gait in  
536 the opposite direction than desired (i.e., worsening the phenotype), and the overwhelming majority of our  
537 findings indicate that any effect of IGF-2 is minor and does not lead to robust, reliable, or reproducible  
538 behavioral changes in either genotype. [Moreover, IGF-2 treatment did not lead to consistent phenotypes  
539 in the previous report by Cruz et al. \(2020\). For instance, IGF-2 was not found to affect motor activity in  
540 an open field but it did lead to increased marble burying, despite motor playing a key role in marble  
541 burying behavior.](#) We did not observe alterations in wildtype mice, which suggests that IGF-2 does not  
542 have motor, communication, or cognition enhancing properties in the time windows we assessed.  
543 Furthermore, we did not observe alteration in seizure threshold or susceptibility. Obvious differences  
544 were Cruz et al.'s utilization of 129 background mice for their audiogenic seizure procedure. AS model  
545 mice on the traditional B6J background do not exhibit [spontaneous seizures nor](#) susceptibility to  
546 audiogenic seizures [66]. We utilized the B6J background with a chemo-convulsant as 129s have a 70%  
547 reduction in corpus callosum volume which adds to their seizure susceptibility [79, 80], and sensory-  
548 dependent audiogenic seizures are triggered by divergent neural circuitry compared to chemo-induction  
549 [81].

550 Therapeutic mimetics of the IGF pathway are being evaluated as small molecule therapy for AS.  
551 They activate PI3K-Akt-mTOR and Ras-MAPK-ERK pathways and have been shown to increase synapse  
552 number and synaptic plasticity [85, 86]. Spine numbers have been shown to be reduced in AS mouse  
553 models [87] and activity dependent ERK phosphorylation and synaptic plasticity are impaired [88-91].  
554 The therapeutic hypothesis is that through upregulating synaptic plasticity and synapse number, these  
555 compounds may have benefit in AS. We wanted to disseminate our mostly negative data as cautionary for  
556 interpreting IGF-2 data, as this ligand shows some non-specificity in binding both the IGF-1 and IGF-2  
557 receptors. [IGF-1 is currently being pursued as a treatment for neurodevelopmental disorders via four  
558 clinical trials: pilot clinical studies of IGF-1 are being conducted in non-genetically specified autism](#)

559 [\(NCT01970345\)](#); two clinical studies of IGF-1 are in process for Phelan McDermid Syndrome, which is a  
560 rare genetic neurodevelopmental disorder associated with mutations in *SHANK3* and one of the most  
561 common comorbid autism-associated syndromes ([NCT01970345](#); [NCT04003207](#)), accounting for up to  
562 ~1 of all syndromic autism [92, 93]; and clinical testing of IGF-1 in Rett Syndrome is also ongoing  
563 ([NCT01777542](#)).

564

### 565 **Limitations**

566

567 The major limitation of the present study is that the results are confined to the three doses (10, 30, and 60  
568  $\mu\text{g}/\text{kg}$ ) and one route of administration (acute subcutaneous injection) used. Particularly, our behavioral  
569 results are limited to a 30  $\mu\text{g}/\text{kg}$  injection of IGF-2 delivered 20 min prior to behavioral testing. It remains  
570 possible that different doses, injection timing and/or frequency, post-administration interval, and/or routes  
571 of administration may show greater efficacy in improving the endpoints measured herein. For instance,  
572 our negative results using an acute systemic treatment of IGF-2 do not preclude the possibility that  
573 chronic delivery of IGF-2 could ameliorate behavioral deficits over longer periods of time. [Additionally,](#)  
574 [our investigation of learning and memory phenotypes was relatively limited so future work would be](#)  
575 [required to comprehensively determine whether IGF-2 could ameliorate learning and memory deficits.](#)

576

### 577 **Conclusions**

578

579 IGF-2 did not show robust effects on key behavioral domains of relevance to AS in two genetic rodent  
580 models of AS, in contrast to a recently published report. Our findings are cautionary and emphasize that it  
581 is important for separate labs to try to replicate each other's experiments – after all, we are in pursuit of  
582 therapeutics with broad and robust efficacy that stand up to the test of minor cross-lab methodological  
583 variations. Minimally two cohorts with standardized methods from the literature should be evaluated.  
584 Future studies that examine EEG activity during behavioral tasks may be the most informative to confirm

585 that subtle alterations in spectral power have functional meaning before its confirmation as a robust  
586 biomarker.

587

588 **List of additional files:**

589

590 File name: Supplementary File 1

591 File format: .docx

592 Title of data: Supplementary Information

593 Description of data: Supplementary methods and figures

594

595 File name: Supplementary File 2

596 File format: .xlsx

597 Title of data: Supplementary File of Statistics

598 Description of data: Detailed statistical parameters for each figure

599

600 **Abbreviations**

601

602 AS: Angelman Syndrome; ASD: autism spectrum disorder; Ube3a: ubiquitin protein ligase E3A; IGF-2:  
603 insulin-like growth factor-2; USV: ultrasonic vocalization; EEG: electroencephalography; NOR: novel  
604 object recognition; PSD: power spectral density.

605

606 **Declarations**

607

608 ***Competing interests***

609 The authors declare that they have no competing interests.

610

611 ***Funding***

612 This work was supported by generous funding from the NIH (R01NS097808; SPP, JLS), the Foundation  
613 for Angelman Syndrome Therapeutics (ELB, AEA, JLS), and the MIND Institute's Intellectual and  
614 Developmental Disabilities Resource Center (NIH U54HD079125; LA).

615

616 ***Ethics approval and consent to participate***

617 All animal experiments were conducted in compliance with the Institutional Animal Care and Use  
618 Committee of University of California Davis or Baylor College of Medicine.

619

620 ***Acknowledgements***

621 We thank Annuska Berz, Markus Wöhr, Timothy Fenton, and Yutian Shen for their support with this  
622 project.

623

624 ***Authors' contributions***

625 ELB and SPP carried out the behavioral experiments and subsequent analyses. HAB performed the  
626 electrophysiology experiments and data analysis. AA collected and analyzed behavioral data. AEA and  
627 JLS supervised the study and interpretations of data. ELB, SPP, and JLS drafted the initial manuscript.  
628 All authors made valuable comments and edits to the manuscript and approved the final version.

629

630 ***Consent for publication***

631 Not applicable.

632

633 **Availability of data and materials**

634 The datasets used in the current study are available from the corresponding author upon request.

635

636 **References**

- 637 1. Albrecht U, Sutcliffe JS, Cattanach BM, Beechey CV, Armstrong D, Eichele G, Beaudet  
638 AL: **Imprinted expression of the murine Angelman syndrome gene, Ube3a, in**  
639 **hippocampal and Purkinje neurons.** *Nat Genet* 1997, **17**:75-78.
- 640 2. Chamberlain SJ, Chen PF, Ng KY, Bourgois-Rocha F, Lemtiri-Chlieh F, Levine ES,  
641 Lalande M: **Induced pluripotent stem cell models of the genomic imprinting**  
642 **disorders Angelman and Prader-Willi syndromes.** *Proc Natl Acad Sci U S A* 2010,  
643 **107**:17668-17673.
- 644 3. Chamberlain SJ, Lalande M: **Neurodevelopmental disorders involving genomic**  
645 **imprinting at human chromosome 15q11-q13.** *Neurobiol Dis* 2010, **39**:13-20.
- 646 4. Chamberlain SJ, Lalande M: **Angelman syndrome, a genomic imprinting disorder of**  
647 **the brain.** *J Neurosci* 2010, **30**:9958-9963.
- 648 5. Kishino T, Lalande M, Wagstaff J: **UBE3A/E6-AP mutations cause Angelman**  
649 **syndrome.** *Nat Genet* 1997, **15**:70-73.
- 650 6. Matsuura T, Sutcliffe JS, Fang P, Galjaard RJ, Jiang YH, Benton CS, Rommens JM,  
651 Beaudet AL: **De novo truncating mutations in E6-AP ubiquitin-protein ligase gene**  
652 **(UBE3A) in Angelman syndrome.** *Nat Genet* 1997, **15**:74-77.
- 653 7. Williams CA: **Neurological aspects of the Angelman syndrome.** *Brain Dev* 2005,  
654 **27**:88-94.
- 655 8. Williams CA: **The behavioral phenotype of the Angelman syndrome.** *Am J Med Genet*  
656 *C Semin Med Genet* 2010, **154C**:432-437.
- 657 9. Williams CA, Angelman H, Clayton-Smith J, Driscoll DJ, Hendrickson JE, Knoll JH,  
658 Magenis RE, Schinzel A, Wagstaff J, Whidden EM, et al.: **Angelman syndrome:**  
659 **consensus for diagnostic criteria. Angelman Syndrome Foundation.** *Am J Med Genet*  
660 1995, **56**:237-238.
- 661 10. Williams CA, Zori RT, Hendrickson J, Stalker H, Marum T, Whidden E, Driscoll DJ:  
662 **Angelman syndrome.** *Curr Probl Pediatr* 1995, **25**:216-231.
- 663 11. Buiting K, Clayton-Smith J, Driscoll DJ, Gillessen-Kaesbach G, Kanber D, Schwinger E,  
664 Williams C, Horsthemke B: **Clinical utility gene card for: Angelman Syndrome.** *Eur J*  
665 *Hum Genet* 2015, **23**.
- 666 12. Buiting K, Williams C, Horsthemke B: **Angelman syndrome - insights into a rare**  
667 **neurogenetic disorder.** *Nat Rev Neurol* 2016, **12**:584-593.
- 668 13. Jiang YH, Armstrong D, Albrecht U, Atkins CM, Noebels JL, Eichele G, Sweatt JD,  
669 Beaudet AL: **Mutation of the Angelman ubiquitin ligase in mice causes increased**  
670 **cytoplasmic p53 and deficits of contextual learning and long-term potentiation.**  
671 *Neuron* 1998, **21**:799-811.
- 672 14. Silva-Santos S, van Woerden GM, Bruinsma CF, Mientjes E, Jolfaei MA, Distel B,  
673 Kushner SA, Elgersma Y: **Ube3a reinstatement identifies distinct developmental**  
674 **windows in a murine Angelman syndrome model.** *J Clin Invest* 2015, **125**:2069-2076.
- 675 15. Jiang YH, Pan Y, Zhu L, Landa L, Yoo J, Spencer C, Lorenzo I, Brilliant M, Noebels J,  
676 Beaudet AL: **Altered ultrasonic vocalization and impaired learning and memory in**



- 677 **Angelman syndrome mouse model with a large maternal deletion from Ube3a to**  
678 **Gabrb3.** *PLoS One* 2010, **5**:e12278.
- 679 16. Berg EL, Pride MC, Petkova SP, Lee RD, Copping NA, Shen Y, Adhikari A, Fenton TA,  
680 Pedersen LR, Noakes LS, et al: **Translational outcomes in a full gene deletion of**  
681 **ubiquitin protein ligase E3A rat model of Angelman syndrome.** *Transl Psychiatry*  
682 2020, **10**:39.
- 683 17. Bou Khalil R: **Is insulin growth factor-1 the future for treating autism spectrum**  
684 **disorder and/or schizophrenia?** *Med Hypotheses* 2017, **99**:23-25.
- 685 18. Bozdagi O, Tavassoli T, Buxbaum JD: **Insulin-like growth factor-1 rescues synaptic**  
686 **and motor deficits in a mouse model of autism and developmental delay.** *Mol Autism*  
687 2013, **4**:9.
- 688 19. Cioana M, Michalski B, Fahnestock M: **Insulin-Like Growth Factor and Insulin-Like**  
689 **Growth Factor Receptor Expression in Human Idiopathic Autism Fusiform Gyrus**  
690 **Tissue.** *Autism Res* 2020, **13**:897-907.
- 691 20. Steinman G: **IGF - Autism prevention/amelioration.** *Med Hypotheses* 2019, **122**:45-47.
- 692 21. Vanhala R, Turpeinen U, Riikonen R: **Low levels of insulin-like growth factor-I in**  
693 **cerebrospinal fluid in children with autism.** *Dev Med Child Neurol* 2001, **43**:614-616.
- 694 22. Bray N: **Neurodevelopmental disorders: righting Rett syndrome with IGF1.** *Nat Rev*  
695 *Drug Discov* 2014, **13**:653.
- 696 23. Castro J, Garcia RI, Kwok S, Banerjee A, Petravicz J, Woodson J, Mellios N, Tropea D,  
697 Sur M: **Functional recovery with recombinant human IGF1 treatment in a mouse**  
698 **model of Rett Syndrome.** *Proc Natl Acad Sci U S A* 2014, **111**:9941-9946.
- 699 24. Pini G, Scusa MF, Benincasa A, Bottiglioni I, Congiu L, Vadhatpour C, Romanelli AM,  
700 Gemo I, Puccetti C, McNamara R, et al: **Repeated insulin-like growth factor 1**  
701 **treatment in a patient with rett syndrome: a single case study.** *Front Pediatr* 2014,  
702 **2**:52.
- 703 25. Pini G, Scusa MF, Congiu L, Benincasa A, Morescalchi P, Bottiglioni I, Di Marco P,  
704 Borelli P, Bonuccelli U, Della-Chiesa A, et al: **IGF1 as a Potential Treatment for Rett**  
705 **Syndrome: Safety Assessment in Six Rett Patients.** *Autism Res Treat* 2012,  
706 **2012**:679801.
- 707 26. Yuan ZF, Mao SS, Shen J, Jiang LH, Xu L, Xu JL, Gao F: **Insulin-Like Growth Factor-**  
708 **1 Down-Regulates the Phosphorylation of FXYD1 and Rescues Behavioral Deficits**  
709 **in a Mouse Model of Rett Syndrome.** *Front Neurosci* 2020, **14**:20.
- 710 27. Kolevzon A, Bush L, Wang AT, Halpern D, Frank Y, Grodberg D, Rapaport R, Tavassoli  
711 T, Chaplin W, Soorya L, Buxbaum JD: **A pilot controlled trial of insulin-like growth**  
712 **factor-1 in children with Phelan-McDermid syndrome.** *Mol Autism* 2014, **5**:54.
- 713 28. Wise TL: **Changes in insulin-like growth factor signaling alter phenotypes in Fragile**  
714 **X Mice.** *Genes Brain Behav* 2017, **16**:241-249.
- 715 29. Steinman G, Mankuta D: **Insulin-like growth factor and the etiology of autism.** *Med*  
716 *Hypotheses* 2013, **80**:475-480.
- 717 30. Steinmetz AB, Stern SA, Kohtz AS, Descalzi G, Alberini CM: **Insulin-Like Growth**  
718 **Factor II Targets the mTOR Pathway to Reverse Autism-Like Phenotypes in Mice.**  
719 *J Neurosci* 2018, **38**:1015-1029.
- 720 31. Bou Khalil R: **Insulin-growth-factor-1 (IGF-1): just a few steps behind the evidence**  
721 **in treating schizophrenia and/or autism.** *CNS Spectr* 2019, **24**:277-278.

- 722 32. Costales J, Kolevzon A: **The therapeutic potential of insulin-like growth factor-1 in**  
723 **central nervous system disorders.** *Neurosci Biobehav Rev* 2016, **63**:207-222.
- 724 33. Linker SB, Mendes APD, Marchetto MC: **IGF-1 treatment causes unique**  
725 **transcriptional response in neurons from individuals with idiopathic autism.** *Mol*  
726 *Autism* 2020, **11**:55.
- 727 34. Kolevzon A, Bush L, Wang AT, Halpern D, Frank Y, Grodberg D, Rapaport R, Tavassoli  
728 T, Chaplin W, Soorya L, Buxbaum JD: **Erratum: A pilot controlled trial of insulin-like**  
729 **growth factor-1 in children with Phelan-McDermid syndrome.** *Mol Autism* 2015,  
730 **6**:31.
- 731 35. Jones JI, Clemmons DR: **Insulin-like growth factors and their binding proteins:**  
732 **biological actions.** *Endocr Rev* 1995, **16**:3-34.
- 733 36. Roth RA: **Structure of the receptor for insulin-like growth factor II: the puzzle**  
734 **amplified.** *Science* 1988, **239**:1269-1271.
- 735 37. Roth RA, Steele-Perkins G, Hari J, Stover C, Pierce S, Turner J, Edman JC, Rutter WJ:  
736 **Insulin and insulin-like growth factor receptors and responses.** *Cold Spring Harb*  
737 *Symp Quant Biol* 1988, **53 Pt 1**:537-543.
- 738 38. Russo VC, Gluckman PD, Feldman EL, Werther GA: **The insulin-like growth factor**  
739 **system and its pleiotropic functions in brain.** *Endocr Rev* 2005, **26**:916-943.
- 740 39. Russo VC, Schutt BS, Andaloro E, Ymer SI, Hoeflich A, Ranke MB, Bach LA, Werther  
741 GA: **Insulin-like growth factor binding protein-2 binding to extracellular matrix**  
742 **plays a critical role in neuroblastoma cell proliferation, migration, and invasion.**  
743 *Endocrinology* 2005, **146**:4445-4455.
- 744 40. Werther GA, Russo V, Baker N, Butler G: **The role of the insulin-like growth factor**  
745 **system in the developing brain.** *Horm Res* 1998, **49 Suppl 1**:37-40.
- 746 41. Chen ST, Jeng YM, Chang CC, Chang HH, Huang MC, Juan HF, Hsu CH, Lee H, Liao  
747 YF, Lee YL, et al: **Insulin-like growth factor II mRNA-binding protein 3 expression**  
748 **predicts unfavorable prognosis in patients with neuroblastoma.** *Cancer Sci* 2011,  
749 **102**:2191-2198.
- 750 42. Stern SA, Kohtz AS, Pollonini G, Alberini CM: **Enhancement of memories by systemic**  
751 **administration of insulin-like growth factor II.** *Neuropsychopharmacology* 2014,  
752 **39**:2179-2190.
- 753 43. Stern SA, Chen DY, Alberini CM: **The effect of insulin and insulin-like growth factors**  
754 **on hippocampus- and amygdala-dependent long-term memory formation.** *Learn*  
755 *Mem* 2014, **21**:556-563.
- 756 44. Duffy KR, Pardridge WM, Rosenfeld RG: **Human blood-brain barrier insulin-like**  
757 **growth factor receptor.** *Metabolism* 1988, **37**:136-140.
- 758 45. Reinhardt RR, Bondy CA: **Insulin-like growth factors cross the blood-brain barrier.**  
759 *Endocrinology* 1994, **135**:1753-1761.
- 760 46. Cruz E, Descalzi G, Steinmetz A, Scharfman HE, Katzman A, Alberini CM:  
761 **CIM6P/IGF-2 Receptor Ligands Reverse Deficits in Angelman Syndrome Model**  
762 **Mice.** *Autism Res* 2020.
- 763 47. Berg EL, Copping NA, Rivera JK, Pride MC, Careaga M, Bauman MD, Berman RF,  
764 Lein PJ, Harony-Nicolas H, Buxbaum JD, et al: **Developmental social communication**  
765 **deficits in the Shank3 rat model of phelan-mcdermid syndrome and autism**  
766 **spectrum disorder.** *Autism Res* 2018.

- 767 48. Dhamne SC, Silverman JL, Super CE, Lammers SHT, Hameed MQ, Modi ME, Copping  
768 NA, Pride MC, Smith DG, Rotenberg A, et al: **Replicable in vivo physiological and**  
769 **behavioral phenotypes of the Shank3B null mutant mouse model of autism.** *Mol*  
770 *Autism* 2017, **8**:26.
- 771 49. Gompers AL, Su-Feher L, Ellegood J, Copping NA, Riyadh MA, Stradleigh TW, Pride  
772 MC, Schaffler MD, Wade AA, Catta-Preta R, et al: **Germline Chd8 haploinsufficiency**  
773 **alters brain development in mouse.** *Nat Neurosci* 2017, **20**:1062-1073.
- 774 50. Silverman JL, Yang M, Lord C, Crawley JN: **Behavioural phenotyping assays for**  
775 **mouse models of autism.** *Nat Rev Neurosci* 2010, **11**:490-502.
- 776 51. Sukoff Rizzo SJ, Silverman JL: **Methodological Considerations for Optimizing and**  
777 **Validating Behavioral Assays.** *Curr Protoc Mouse Biol* 2016, **6**:364-379.
- 778 52. Wohr M, Silverman JL, Scattoni ML, Turner SM, Harris MJ, Saxena R, Crawley JN:  
779 **Developmental delays and reduced pup ultrasonic vocalizations but normal**  
780 **sociability in mice lacking the postsynaptic cell adhesion protein neuroligin2.** *Behav*  
781 *Brain Res* 2013, **251**:50-64.
- 782 53. Yang M, Bozdagi O, Scattoni ML, Wohr M, Rouillet FI, Katz AM, Abrams DN,  
783 Kalikhman D, Simon H, Woldeyohannes L, et al: **Reduced excitatory**  
784 **neurotransmission and mild autism-relevant phenotypes in adolescent Shank3 null**  
785 **mutant mice.** *J Neurosci* 2012, **32**:6525-6541.
- 786 54. Gulinello M, Mitchell HA, Chang Q, Timothy O'Brien W, Zhou Z, Abel T, Wang L,  
787 Corbin JG, Veeraragavan S, Samaco RC, et al: **Rigor and reproducibility in rodent**  
788 **behavioral research.** *Neurobiol Learn Mem* 2018.
- 789 55. Copping NA, Adhikari A, Petkova SP, Silverman JL: **Genetic backgrounds have**  
790 **unique seizure response profiles and behavioral outcomes following convulsant**  
791 **administration.** *Epilepsy Behav* 2019, **101**:106547.
- 792 56. Born HA, Martinez LA, Levine AT, Harris SE, Mehra S, Lee WL, Dindot SV, Nash KR,  
793 Silverman JL, Segal DJ, et al: **Early Developmental EEG and Seizure Phenotypes in a**  
794 **Full Gene Deletion of Ubiquitin Protein Ligase E3A Rat Model of Angelman**  
795 **Syndrome.** *eNeuro* 2021, **8**.
- 796 57. Berg EL, Pedersen LR, Pride MC, Petkova SP, Patten KT, Valenzuela AE, Wallis C,  
797 Bein KJ, Wexler A, Lein PJ, Silverman JL: **Developmental exposure to near roadway**  
798 **pollution produces behavioral phenotypes relevant to neurodevelopmental disorders**  
799 **in juvenile rats.** *Transl Psychiatry* 2020, **10**:289.
- 800 58. Berg EL, Ching TM, Bruun DA, Rivera JK, Careaga M, Ellegood J, Lerch JP, Wohr M,  
801 Lein PJ, Silverman JL: **Translational outcomes relevant to neurodevelopmental**  
802 **disorders following early life exposure of rats to chlorpyrifos.** *J Neurodev Disord*  
803 2020, **12**:40.
- 804 59. Wohr M, Engelhardt KA, Seffer D, Sungur AO, Schwarting RK: **Acoustic**  
805 **Communication in Rats: Effects of Social Experiences on Ultrasonic Vocalizations**  
806 **as Socio-affective Signals.** *Curr Top Behav Neurosci* 2017, **30**:67-89.
- 807 60. Adhikari A, Copping NA, Onaga B, Pride MC, Coulson RL, Yang M, Yasui DH, LaSalle  
808 JM, Silverman JL: **Cognitive Deficits in the Snord116 Deletion Mouse Model for**  
809 **Prader-Willi Syndrome.** *Neurobiol Learn Mem* 2018.
- 810 61. Copping NA, Berg EL, Foley GM, Schaffler MD, Onaga BL, Buscher N, Silverman JL,  
811 Yang M: **Touchscreen learning deficits and normal social approach behavior in the**  
812 **Shank3B model of Phelan-McDermid Syndrome and autism.** *Neuroscience* 2016.

- 813 62. Silverman JL, Pride MC, Hayes JE, Puhger KR, Butler-Struben HM, Baker S, Crawley  
814 JN: **GABAB Receptor Agonist R-Baclofen Reverses Social Deficits and Reduces**  
815 **Repetitive Behavior in Two Mouse Models of Autism.** *Neuropsychopharmacology*  
816 2015, **40**:2228-2239.
- 817 63. Ellegood J, Petkova SP, Kinman A, Qiu LR, Adhikari A, Wade AA, Fernandes D,  
818 Lindenmaier Z, Creighton A, Nutter LMJ, et al: **Neuroanatomy and behavior in mice**  
819 **with a haploinsufficiency of AT-rich interactive domain 1B (ARID1B) throughout**  
820 **development.** *Mol Autism* 2021, **12**:25.
- 821 64. Copping NA, Christian SGB, Ritter DJ, Islam MS, Buscher N, Zolkowska D, Pride MC,  
822 Berg EL, LaSalle JM, Ellegood J, et al: **Neuronal overexpression of Ube3a isoform 2**  
823 **causes behavioral impairments and neuroanatomical pathology relevant to 15q11.2-**  
824 **q13.3 duplication syndrome.** *Hum Mol Genet* 2017, **26**:3995-4010.
- 825 65. Bevins RA, Besheer J: **Object recognition in rats and mice: a one-trial non-matching-**  
826 **to-sample learning task to study 'recognition memory'.** *Nat Protoc* 2006, **1**:1306-  
827 1311.
- 828 66. Sonzogni M, Wallaard I, Santos SS, Kingma J, du Mee D, van Woerden GM, Elgersma  
829 Y: **A behavioral test battery for mouse models of Angelman syndrome: a powerful**  
830 **tool for testing drugs and novel Ube3a mutants.** *Mol Autism* 2018, **9**:47.
- 831 67. Ostrowski LM, Spencer ER, Bird LM, Thibert R, Komorowski RW, Kramer MA, Chu  
832 CJ: **Delta power robustly predicts cognitive function in Angelman syndrome.** *Ann*  
833 *Clin Transl Neurol* 2021.
- 834 68. Dodge A, Peters MM, Greene HE, Dietrick C, Botelho R, Chung D, Willman J,  
835 Nennering AW, Ciarlone S, Kamath SG, et al: **Generation of a Novel Rat Model of**  
836 **Angelman Syndrome with a Complete Ube3a Gene Deletion.** *Autism Res* 2020,  
837 **13**:397-409.
- 838 69. den Bakker H, Sidorov MS, Fan Z, Lee DJ, Bird LM, Chu CJ, Philpot BD: **Abnormal**  
839 **coherence and sleep composition in children with Angelman syndrome: a**  
840 **retrospective EEG study.** *Mol Autism* 2018, **9**:32.
- 841 70. Ehlen JC, Jones KA, Pinckney L, Gray CL, Burette S, Weinberg RJ, Evans JA, Brager  
842 AJ, Zylka MJ, Paul KN, et al: **Maternal Ube3a Loss Disrupts Sleep Homeostasis But**  
843 **Leaves Circadian Rhythmicity Largely Intact.** *J Neurosci* 2015, **35**:13587-13598.
- 844 71. Adhikari A, Copping NA, Beegle J, Cameron DL, Deng P, O'Geen H, Segal DJ, Fink  
845 KD, Silverman JL, Anderson JS: **Functional rescue in an Angelman syndrome model**  
846 **following treatment with lentivector transduced hematopoietic stem cells.** *Hum Mol*  
847 *Genet* 2021, **30**:1067-1083.
- 848 72. Born HA, Dao AT, Levine AT, Lee WL, Mehta NM, Mehra S, Weeber EJ, Anderson  
849 AE: **Strain-dependence of the Angelman Syndrome phenotypes in Ube3a maternal**  
850 **deficiency mice.** *Sci Rep* 2017, **7**:8451.
- 851 73. Copping NA, Silverman JL: **Abnormal electrophysiological phenotypes and sleep**  
852 **deficits in a mouse model of Angelman Syndrome.** *Mol Autism* 2021, **12**:9.
- 853 74. Sidorov MS, Deck GM, Dolatshahi M, Thibert RL, Bird LM, Chu CJ, Philpot BD: **Delta**  
854 **rhythmicity is a reliable EEG biomarker in Angelman syndrome: a parallel mouse**  
855 **and human analysis.** *J Neurodev Disord* 2017, **9**:17.
- 856 75. Ey E, Yang M, Katz AM, Woldeyohannes L, Silverman JL, Leblond CS, Faure P,  
857 Torquet N, Le Sourd AM, Bourgeron T, Crawley JN: **Absence of deficits in social**

- 858 **behaviors and ultrasonic vocalizations in later generations of mice lacking**  
859 **neuroligin4.** *Genes Brain Behav* 2012, **11**:928-941.
- 860 76. SP P, JD D, JL S: **Gait as Translational Outcome for Angelman Syndrome** *Autism*  
861 *Research* 2021.
- 862 77. Frohlich J, Miller MT, Bird LM, Garces P, Purtell H, Hoener MC, Philpot BD, Sidorov  
863 MS, Tan WH, Hernandez MC, et al: **Electrophysiological Phenotype in Angelman**  
864 **Syndrome Differs Between Genotypes.** *Biol Psychiatry* 2019, **85**:752-759.
- 865 78. Frohlich J, Senturk D, Saravanapandian V, Golshani P, Reiter LT, Sankar R, Thibert RL,  
866 DiStefano C, Huberty S, Cook EH, Jeste SS: **A Quantitative Electrophysiological**  
867 **Biomarker of Duplication 15q11.2-q13.1 Syndrome.** *PLoS One* 2016, **11**:e0167179.
- 868 79. Judson MC, Wallace ML, Sidorov MS, Burette AC, Gu B, van Woerden GM, King IF,  
869 Han JE, Zylka MJ, Elgersma Y, et al: **GABAergic Neuron-Specific Loss of Ube3a**  
870 **Causes Angelman Syndrome-Like EEG Abnormalities and Enhances Seizure**  
871 **Susceptibility.** *Neuron* 2016, **90**:56-69.
- 872 80. Sidorov MS, Deck GM, Dolatshahi M, Thibert RL, Bird LM, Chu CJ, Philpot BD:  
873 **Erratum to: Delta rhythmicity is a reliable EEG biomarker in Angelman syndrome:**  
874 **a parallel mouse and human analysis.** *J Neurodev Disord* 2017, **9**:30.
- 875 81. A\* A, NA C, KD F, JL S, JD A: **Functional rescue in an Angelman syndrome model**  
876 **following treatment with lentivector transduced hematopoietic stem cells**  
877 **. *Human Molecular Genetics* 2021, In Press.**
- 878 82. Silverman JL, Nithianantharajah J, Der-Avakian A, Young JW, Sukoff Rizzo SJ: **Lost in**  
879 **translation: At the crossroads of face validity and translational utility of behavioral**  
880 **assays in animal models for the development of therapeutics.** *Neurosci Biobehav Rev*  
881 2020, **116**:452-453.
- 882 83. Sukoff Rizzo SJ, Anderson LC, Green TL, McGarr T, Wells G, Winter SS: **Assessing**  
883 **Healthspan and Lifespan Measures in Aging Mice: Optimization of Testing**  
884 **Protocols, Replicability, and Rater Reliability.** *Curr Protoc Mouse Biol* 2018, **8**:e45.
- 885 84. Gulinello M, Mitchell HA, Chang Q, Timothy O'Brien W, Zhou Z, Abel T, Wang L,  
886 Corbin JG, Veeraragavan S, Samaco RC, et al: **Rigor and reproducibility in rodent**  
887 **behavioral research.** *Neurobiol Learn Mem* 2019, **165**:106780.
- 888 85. Guan J, Harris P, Brimble M, Lei Y, Lu J, Yang Y, Gunn AJ: **The role for IGF-1-**  
889 **derived small neuropeptides as a therapeutic target for neurological disorders.**  
890 *Expert Opin Ther Targets* 2015, **19**:785-793.
- 891 86. Dyer AH, Vahdatpour C, Sanfeliu A, Tropea D: **The role of Insulin-Like Growth**  
892 **Factor 1 (IGF-1) in brain development, maturation and neuroplasticity.**  
893 *Neuroscience* 2016, **325**:89-99.
- 894 87. Dindot SV, Antalffy BA, Bhattacharjee MB, Beaudet AL: **The Angelman syndrome**  
895 **ubiquitin ligase localizes to the synapse and nucleus, and maternal deficiency results**  
896 **in abnormal dendritic spine morphology.** *Hum Mol Genet* 2008, **17**:111-118.
- 897 88. Filonova I, Trotter JH, Banko JL, Weeber EJ: **Activity-dependent changes in MAPK**  
898 **activation in the Angelman Syndrome mouse model.** *Learn Mem* 2014, **21**:98-104.
- 899 89. Greer PL, Hanayama R, Bloodgood BL, Mardinly AR, Lipton DM, Flavell SW, Kim TK,  
900 Griffith EC, Waldon Z, Maehr R, et al: **The Angelman Syndrome protein Ube3A**  
901 **regulates synapse development by ubiquitinating arc.** *Cell* 2010, **140**:704-716.
- 902 90. Sato M, Stryker MP: **Genomic imprinting of experience-dependent cortical plasticity**  
903 **by the ubiquitin ligase gene Ube3a.** *Proc Natl Acad Sci U S A* 2010, **107**:5611-5616.

- 904 91. Yashiro K, Riday TT, Condon KH, Roberts AC, Bernardo DR, Prakash R, Weinberg RJ,  
905 Ehlers MD, Philpot BD: **Ube3a is required for experience-dependent maturation of**  
906 **the neocortex.** *Nat Neurosci* 2009, **12**:777-783.
- 907 92. Betancur C, Buxbaum JD: **SHANK3 haploinsufficiency: a "common" but**  
908 **underdiagnosed highly penetrant monogenic cause of autism spectrum disorders.**  
909 *Mol Autism* 2013, **4**:17.
- 910 93. Durand CM, Betancur C, Boeckers TM, Bockmann J, Chaste P, Fauchereau F, Nygren G,  
911 Rastam M, Gillberg IC, Anckarsater H, et al: **Mutations in the gene encoding the**  
912 **synaptic scaffolding protein SHANK3 are associated with autism spectrum**  
913 **disorders.** *Nat Genet* 2007, **39**:25-27.

914

## Figure Legends

915  
916 **Fig. 1 IGF-2 reduced cortical and hippocampal delta power in *Ube3a*<sup>mat-/pat+</sup> rats.** (A) Baseline  
917 cortical and (B) hippocampal power pre-injection trended higher in *Ube3a*<sup>mat-/pat+</sup> (mat-/pat+) rats  
918 compared to wildtype (*Ube3a*<sup>mat+/pat+</sup>; mat+/pat+) rats. (C) Following injection of IGF-2, cortical and (D)  
919 hippocampal power was unaltered in wildtype rats. (E) In mat-/pat+ rats, treatment with 10 or 30 µg/kg  
920 IGF-2 led to reduced cortical power at 1-4 Hz, while treatment with 60 µg/kg IGF-2 reduced cortical  
921 power at 1-3 Hz. (F) Hippocampal power was unchanged by IGF-2 in mat-/pat+ rats. (G) Cortical power  
922 at 1 and 2 Hz (“delta power”) was lower in mat-/pat+ rats following treatment with 10 or 30 µg/kg IGF-2  
923 compared to vehicle. (H) Across both genotypes, hippocampal delta power (at 1 and 2 Hz) was also  
924 reduced by 10 and 30 µg/kg IGF-2. Data are expressed as mean ± S.E.M. *n*=3-4 rats/genotype. E:  
925 \**p*<0.05 vs. mat-/pat+ Vehicle, Sidak’s multiple comparisons following repeated measures ANOVA. G,  
926 H: \**p*<0.05, Tukey’s multiple comparisons following repeated measures ANOVA.

927  
928 **Fig. 2 IGF-2 did not rescue or improve motor learning or social communication in *Ube3a*<sup>mat-/pat+</sup>**  
929 **rats.** (A) Latency to fall off an accelerating rotarod significantly improved from session 1 to 3 for both  
930 wildtype groups (*Ube3a*<sup>mat+/pat+</sup>; mat+/pat+), but not for either *Ube3a*<sup>mat-/pat+</sup> group (mat-/pat+). (B) At  
931 PND 10, mat-/pat+ pups emitted fewer isolation-induced ultrasonic vocalizations (USV) than wildtype  
932 littermates, but IGF-2 had no effect on vocalization rates. (C) All groups showed behavioral inhibition  
933 (i.e., reduced locomotion) during playback of white noise compared to baseline. (D) During playback of  
934 pro-social 50-kHz USV, only the wildtype groups, and not mat-/pat+ rats, spent significantly more time  
935 on the arms proximal to the speaker compared to the distal arms (i.e., social approach). Data are  
936 expressed as mean ± S.E.M. *n*=6-25 rats/group. A: \**p*<0.05, Day 1 vs. 3, Tukey’s multiple comparisons  
937 following three-way ANOVA. B: \**p*<0.05, main effect of genotype, two-way ANOVA. C, D: \**p*<0.05,  
938 paired *t*-test. ns, not significantly different, *p*>0.05.

939

940 **Fig. 3 IGF-2 did not markedly improve motor deficits, seizure threshold, or object recognition in**  
941 ***Ube3a*<sup>mat-/pat+</sup> mice.** (A) Horizontal and (B) vertical activity in an open field assay were reduced in  
942 *Ube3a*<sup>mat-/pat+</sup> mice (mat-/pat+) compared to wildtype littermates (*Ube3a*<sup>mat+/pat+</sup>; mat+/pat+), but  
943 unaffected by IGF-2. (C) Center time did not differ among groups. (D) Latency to cross a thin beam was  
944 elevated in mat-/pat+ mice, but unchanged by IGF-2. (E) Accelerating rotarod performance was  
945 moderately improved by IGF-2 treatment in mat-/pat+ mice, however only on the first day of testing. (F)  
946 Regardless of IGF-2 treatment, mat-/pat+ mice demonstrated a marble burying deficit and (G) mat-/pat+  
947 mice were quicker to exhibit generalized clonus following pentylenetetrazol administration, which was  
948 unaffected by IGF-2. (H) All groups demonstrated intact novel object recognition as measured by more  
949 time spent investigating the novel object compared to the familiar object and by (I) novel object percent  
950 preference. Data are expressed as mean ± S.E.M. *n*=10-22 mice/group. A-D, F, G: \**p*<0.05, main effect  
951 of genotype, two-way ANOVA. E: \**p*<0.05 vs. mat+/pat+ vehicle, Tukey's multiple comparisons test  
952 following three-way ANOVA. H: \**p*<0.05, paired *t*-test.

953

954 **Fig. 4 IGF-2 did not rescue or improve gait deficits in *Ube3a*<sup>mat-/pat+</sup> mice.** (A) Compared to wildtype  
955 littermates (*Ube3a*<sup>mat+/pat+</sup>; mat+/pat+), *Ube3a*<sup>mat-/pat+</sup> (mat-/pat+) mice exhibited wider stances while  
956 treadmill walking, which were unaffected by IGF-2 treatment. (B) Stride lengths were increased in mat-  
957 /pat+ mice and were further increased by IGF-2 while (C) the reduced stride frequency of mat-/pat+ mice  
958 was further decreased in forelimbs by IGF-2. (D) IGF-2 had no effect on the elevated forelimb propulsion  
959 time of mat-/pat+ mice and led to further elevation of the increased hindlimb propulsion time. (E) Swing  
960 time was elevated in mat-/pat+ mice, regardless of IGF-2 treatment and (F) brake time was normal in  
961 mat-/pat+ mice and unchanged by IGF-2. Data are expressed as mean ± S.E.M. *n*=17-24 mice/group. A-  
962 F: \**p*<0.05, Sidak's or Tukey's multiple comparisons test following two-way ANOVA (per limb set). ns,  
963 not significantly different, *p*>0.05.



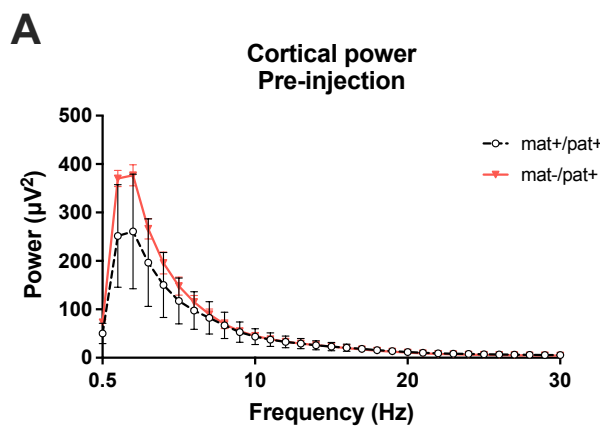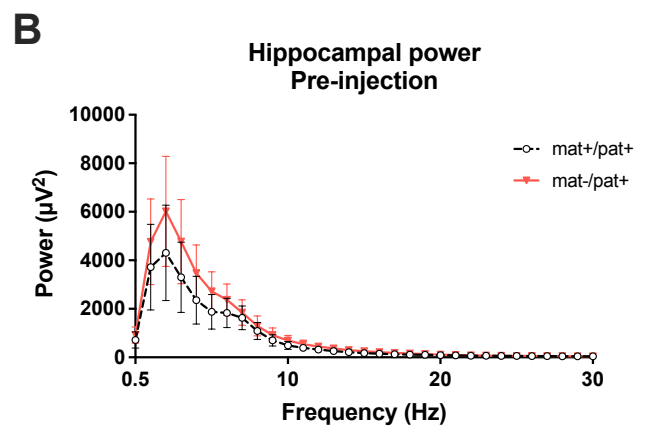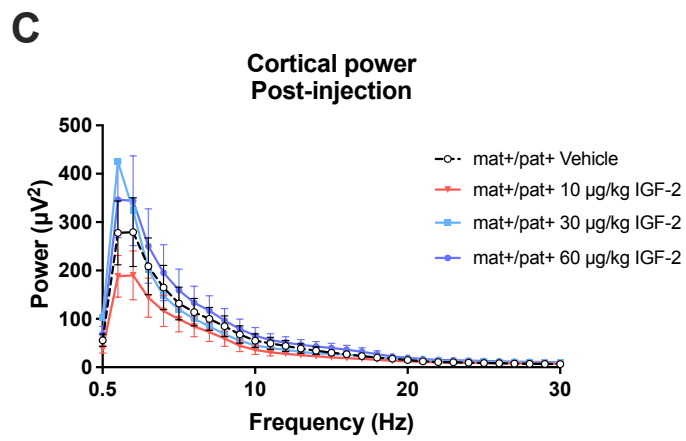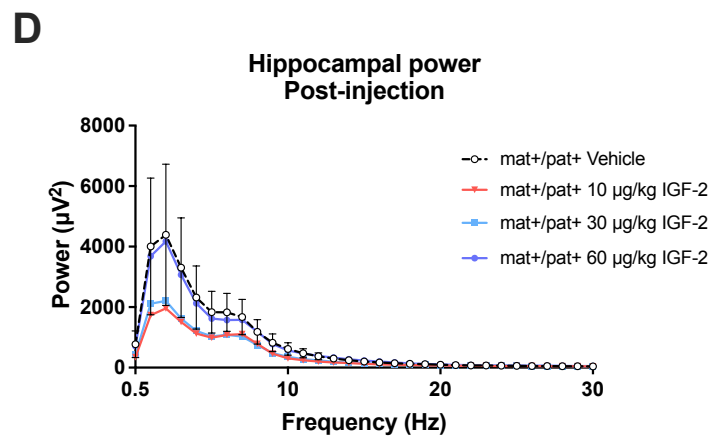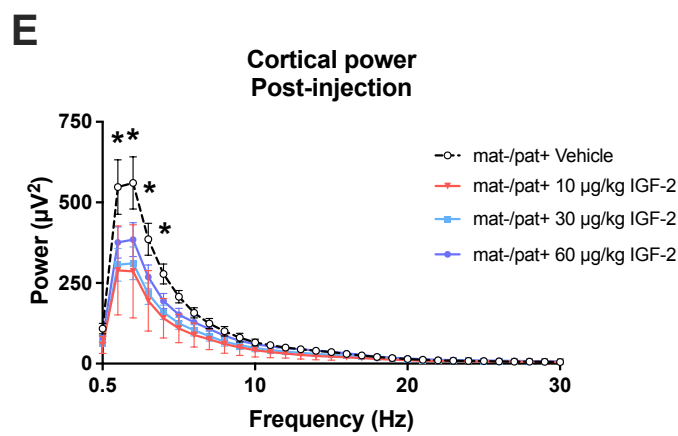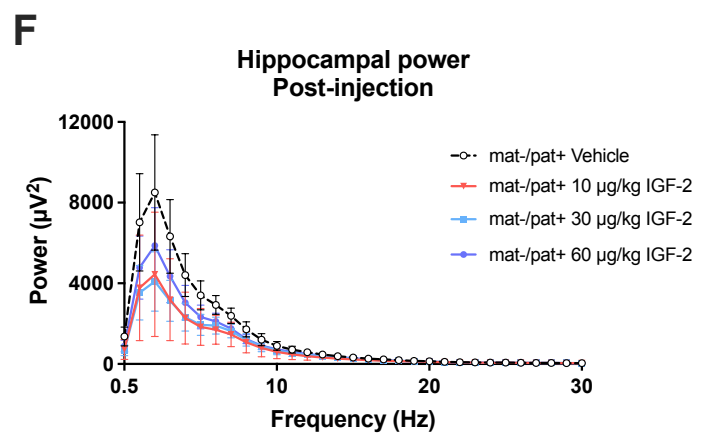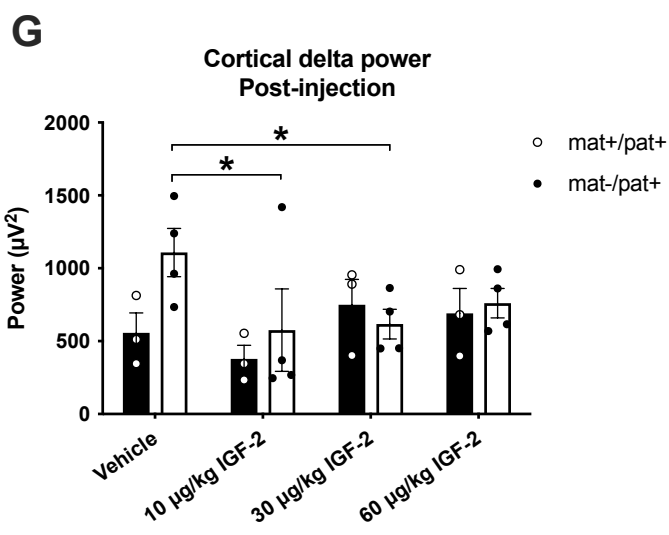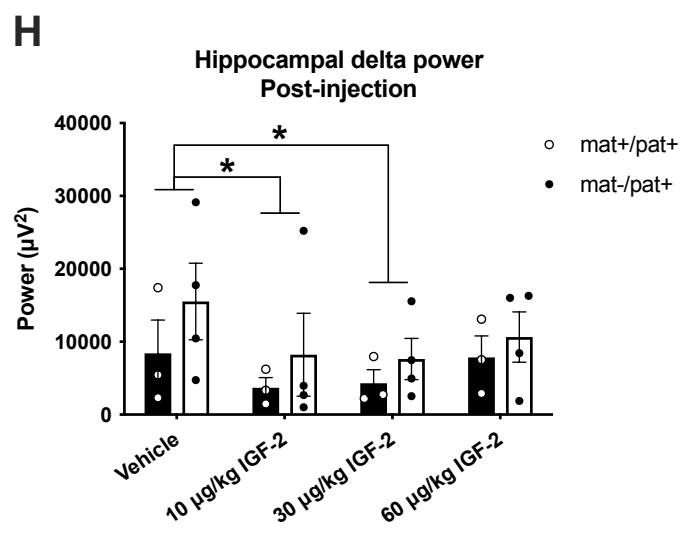

**A**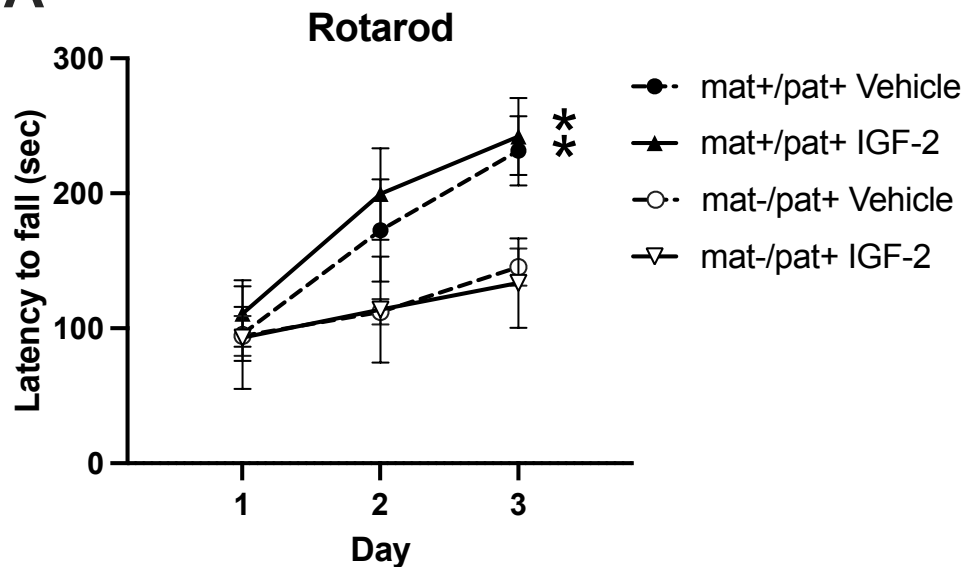**B**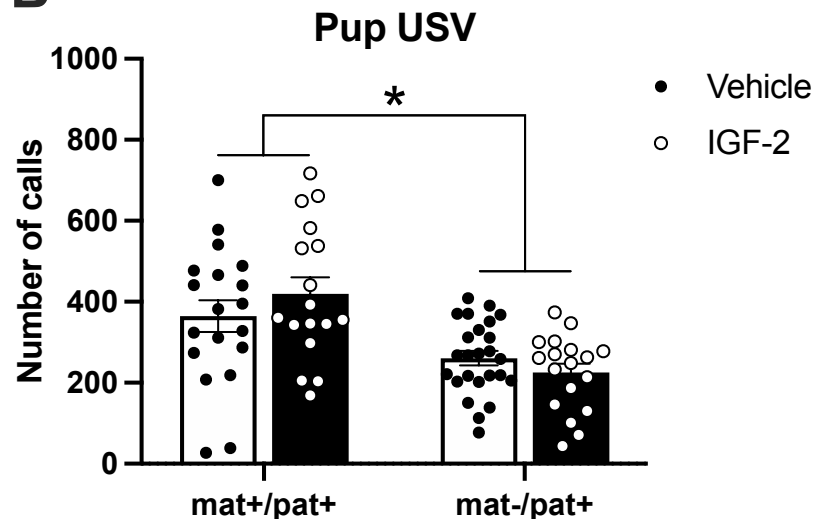**C**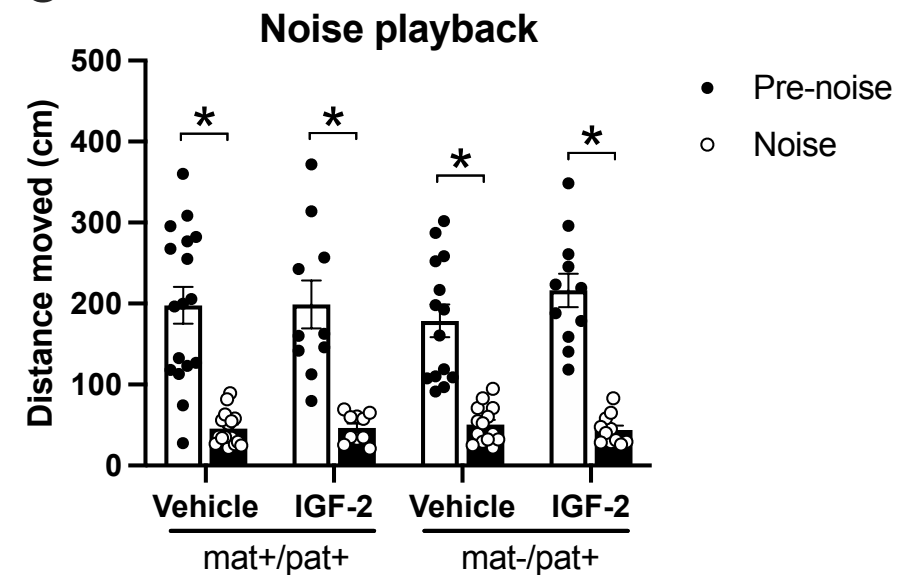**D**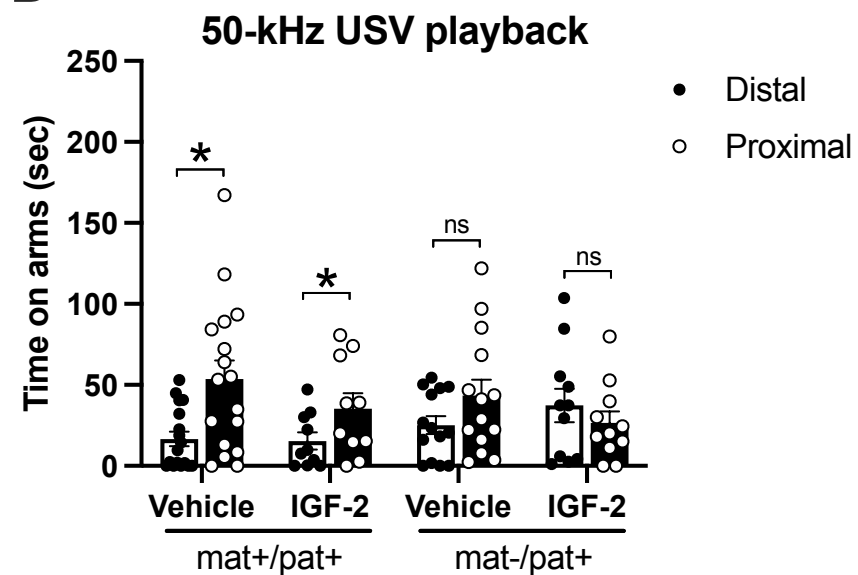

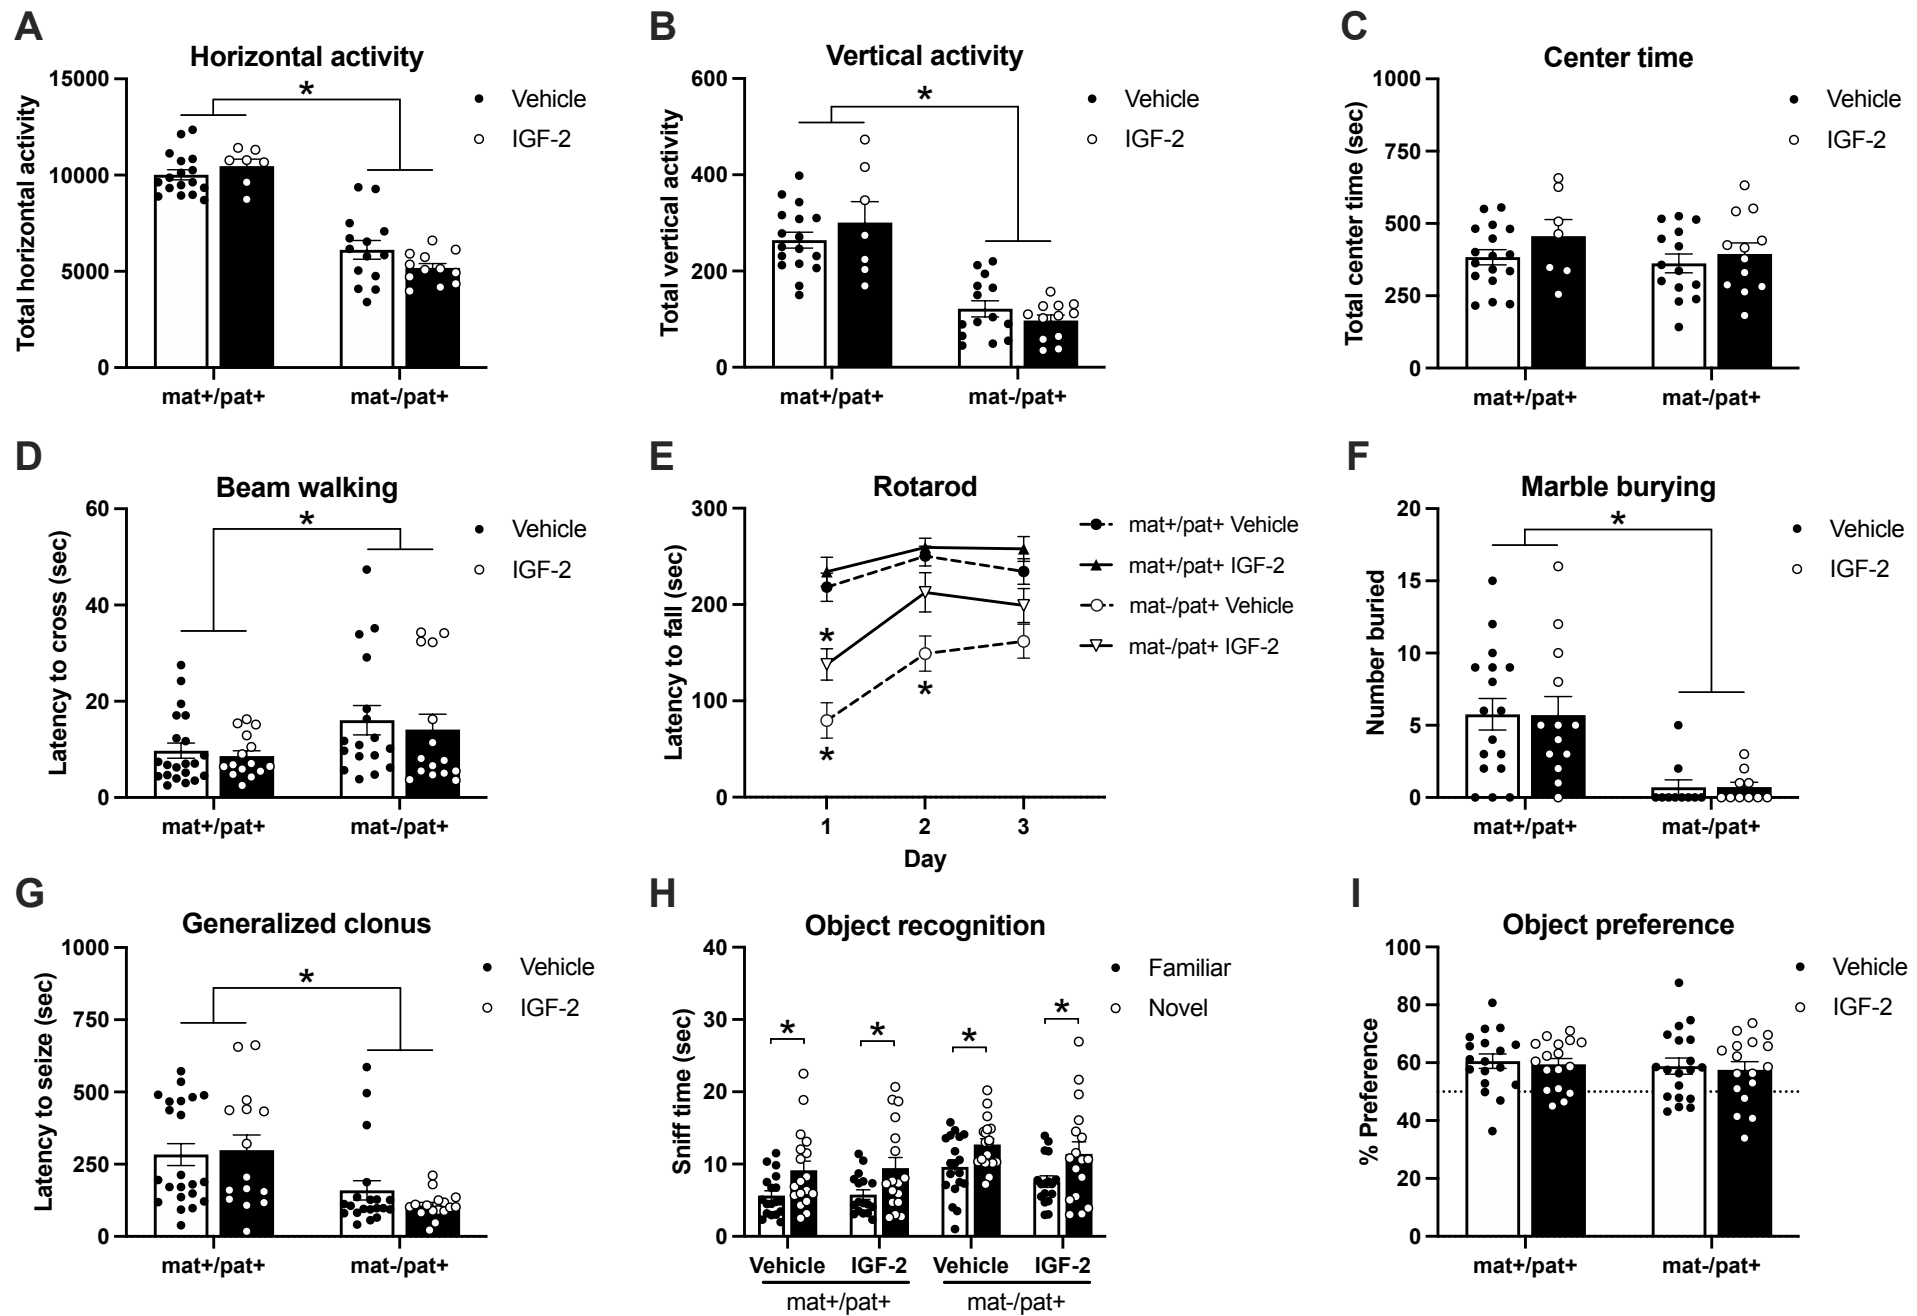

**A****Stance width**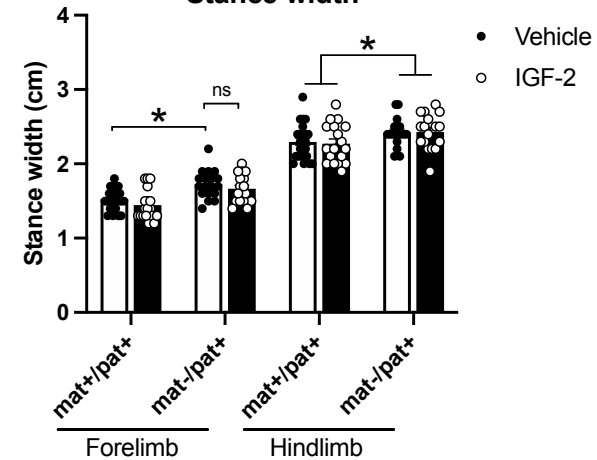**B****Stride length**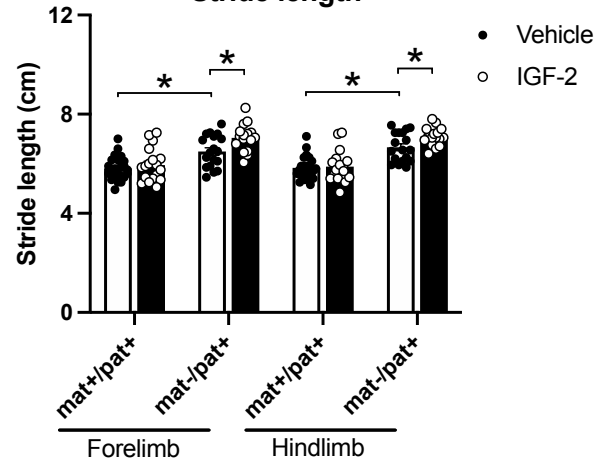**C****Stride frequency**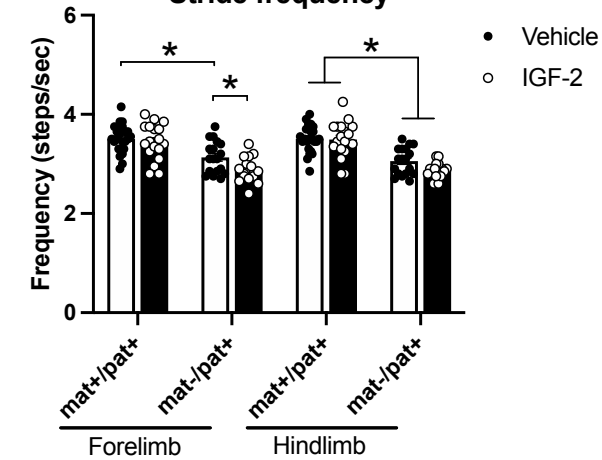**D****Propulsion time**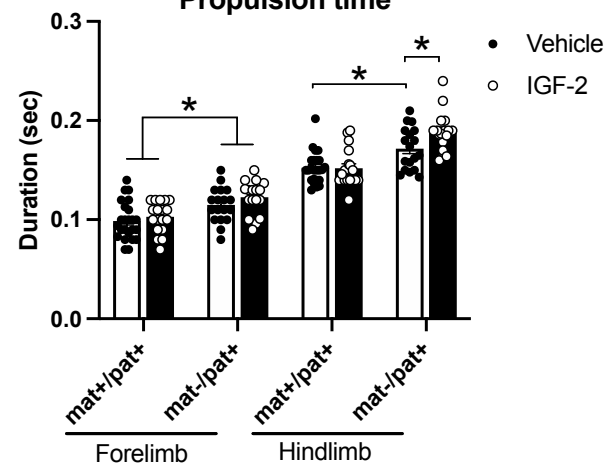**E****Swing time**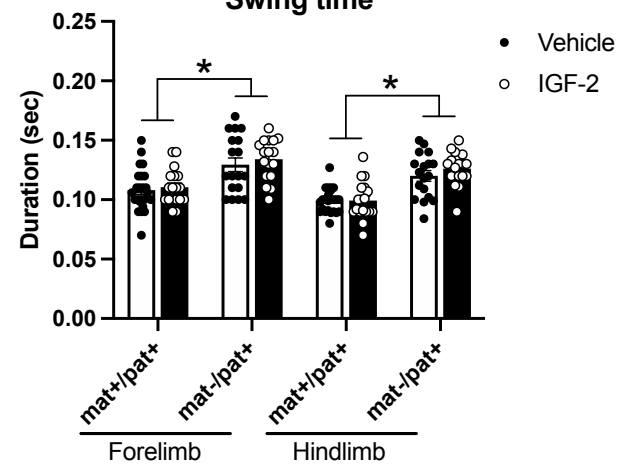**F****Brake time**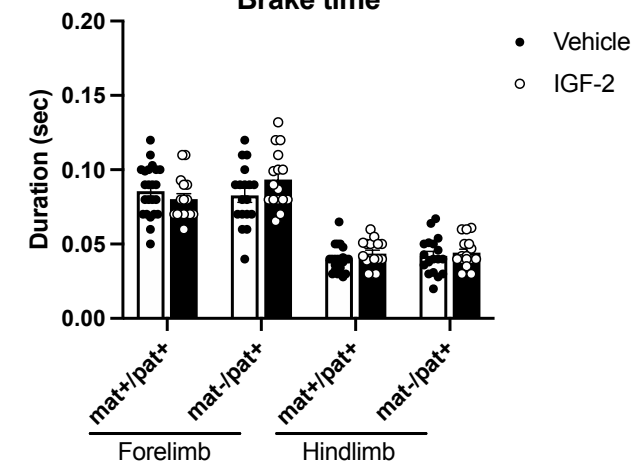

Source: https://www.biorxiv.org/content/10.1101/2021.08.13.456299v1.full.pdf
